# Supplementary material for: Increasing engagement in advance care planning using a behaviour change model: study protocol for the STAMP randomised controlled trials
Source: PubMed Central journal article supplement — BMJ Open. 2018 Aug 10;8(8):e025340. doi: 10.1136/bmjopen-2018-025340 (PMC6089328; doi:10.1136/bmjopen-2018-025340), 2018-08-10
Supplement: bmjopen-2018-025340.draft_revisions.pdf [file bmjopen-2018-025340.draft_revisions.pdf]

# BMJ Open

BMJ Open is committed to open peer review. As part of this commitment we make the peer review history of every article we publish publicly available.

When an article is published we post the peer reviewers' comments and the authors' responses online. We also post the versions of the paper that were used during peer review. These are the versions that the peer review comments apply to.

The versions of the paper that follow are the versions that were submitted during the peer review process. They are not the versions of record or the final published versions. They should not be cited or distributed as the published version of this manuscript.

BMJ Open is an open access journal and the full, final, typeset and author-corrected version of record of the manuscript is available on our site with no access controls, subscription charges or pay-per-view fees (<http://bmjopen.bmj.com>).

If you have any questions on BMJ Open's open peer review process please email [info.bmjopen@bmj.com](mailto:info.bmjopen@bmj.com)

# BMJ Open

## Increasing Engagement in Advance Care Planning Using a Behavior Change Model: Study Protocol for the STAMP Randomised Controlled Trials

|                               |                                                                                                                                                                                                                                    |
|-------------------------------|------------------------------------------------------------------------------------------------------------------------------------------------------------------------------------------------------------------------------------|
| Journal:                      | <i>BMJ Open</i>                                                                                                                                                                                                                    |
| Manuscript ID                 | bmjopen-2018-025340                                                                                                                                                                                                                |
| Article Type:                 | Protocol                                                                                                                                                                                                                           |
| Date Submitted by the Author: | 10-Jul-2018                                                                                                                                                                                                                        |
| Complete List of Authors:     | Fried, Terri R.; Yale Univ,<br>Redding, Colleen<br>Martino, Steven<br>Paiva, Andrea; University of Rhode Island<br>Iannone, Lynne<br>Zenoni, Maria<br>Blakley, Laura<br>Rossi, JS; The University of Rhode Island<br>O'Leary, John |
| Keywords:                     | advance care planning, health behavior, randomised controlled trial                                                                                                                                                                |
|                               |                                                                                                                                                                                                                                    |

SCHOLARONE™  
Manuscripts

1  
2  
3 Increasing Engagement in Advance Care Planning Using a Behavior Change Model: Study  
4  
5 Protocol for the STAMP Randomised Controlled Trials  
6  
7

8  
9 Terri R. Fried,<sup>1,2</sup> Colleen A. Redding,<sup>3,4</sup> Steven Martino,<sup>5,6</sup> Andrea Paiva,<sup>3,4</sup> Lynne Iannone,<sup>2,7</sup>  
10  
11 Maria Zenoni,<sup>2,7</sup> Laura A. Blakley,<sup>5,6</sup> Joseph S. Rossi,<sup>3,4</sup> John O'Leary<sup>2,7</sup>  
12  
13

14  
15  
16 <sup>1</sup> Department of Medicine, Yale School of Medicine, New Haven, Connecticut, USA

17  
18 <sup>2</sup> Clinical Epidemiology Research Center, VA Connecticut Healthcare System, West Haven,  
19  
20 Connecticut, USA

21  
22 <sup>3</sup> Cancer Prevention Research Center, College of Health Sciences, University of Rhode Island,  
23  
24 Kingston, Rhode Island, USA

25  
26 <sup>4</sup> Psychology Department, College of Health Sciences, University of Rhode Island, Kingston,  
27  
28 Rhode Island, USA

29  
30 <sup>5</sup> Department of Psychiatry, Yale School of Medicine, New Haven, Connecticut, USA

31  
32 <sup>6</sup> Psychology Service, VA Connecticut Healthcare System, West Haven, Connecticut, USA

33  
34  
35 <sup>7</sup> Program on Aging, Yale School of Medicine, New Haven, Connecticut, USA  
36  
37

38  
39 Corresponding author: Terri R. Fried, MD, CERC 240, VA Connecticut Healthcare System, 950

40  
41 Campbell Avenue, West Haven, Connecticut, USA 06516. E-mail: [terri.fried@yale.edu](mailto:terri.fried@yale.edu)

42  
43 Telephone: 1-203-932-5711 x5412  
44  
45

46  
47 Word count: 4,537  
48  
49  
50  
51  
52  
53  
54  
55  
56  
57  
58  
59  
60

## ABSTRACT

**Introduction:** Advance care planning (ACP) is a key component of high-quality end-of-life care but is underutilized. Interventions based on models of behavior change may fill an important gap in available programs to increase ACP engagement. Such interventions are designed for broad outreach and flexibility in delivery. The purpose of the STAMP (Sharing and Talking about My Preferences) study is to examine the efficacy of three behavior-change approaches to increasing ACP engagement through two related randomised controlled trials being conducted in different settings (Veterans Affairs [VA] medical center and community).

**Methods and analysis:** Eligible participants are 55 or older. Participants in the community are being recruited in person in primary care and specialty outpatient practices and senior living sites, and participants in the VA are recruited by telephone. In the community, randomization is at the level of the practice or site, with all persons at a given practice/site receiving either computer-tailored feedback with a behavior stage-matched brochure (CTI) or usual care. At the VA, randomization is at the level of the participant and is stratified by the number of ACP behaviors completed at baseline. Participants are randomised to one of four groups: CTI, motivational interviewing, motivational enhancement therapy, or usual care. The primary outcome is completion of four key ACP behaviors: identification of a surrogate decision maker, communication about goals, completing advance directives, and ensuring documents are in the medical record. Analysis will be conducted using mixed effects models, taking into account the clustered randomisation for the community study.

**Ethics and randomization:** The studies have been approved by the appropriate Institutional Review Boards and are being overseen by a Safety Monitoring Committee. The results of these studies will be disseminated to academic audiences and leadership in in the community and VA sites.

**Trial registration numbers:** NCT03137459, NCT03103828

### Strengths and limitations of this study

- The intervention is based on a comprehensive model of advance care planning (ACP) that focuses on enhancing engagement and improving communication among patients, their surrogates, and their providers.
- The behavioral health approach to ACP provides a framework for practical interventions that can be implemented in a wide variety of settings.
- The interventions have been developed in English only, and the study therefore excludes individuals whose primary language is other than English.
- The study is being conducted in a single geographic region and therefore may have limited generalizability.

**Key words:** Advance care planning; health behavior; randomised controlled trial

## INTRODUCTION

The Institute of Medicine (IOM) report, “Dying in America: Improving Quality and Honoring Individual Preferences near the End of Life” devotes an entire chapter to advance care planning (ACP), the process by which patients can plan for the care they will receive if they become incapable of participating in medical decision making.<sup>1</sup> The report endorses the promise of ACP to provide “a measure of control over the final phase of life” and to ensure that “patients’ wishes are known and respected to the extent possible.” ACP is also associated with improved caregiver outcomes.<sup>2,3</sup> However, as outlined in the IOM report chapter, ACP remains underutilized. A recent systematic review concluded that only approximately one-third of adults in the United States has completed advance directives (ADs).<sup>4</sup> Moreover, ADs alone are not sufficient in the absence of efforts to promote communication.<sup>5</sup>

Several intervention approaches have demonstrated efficacy in increasing engagement in ACP. Respecting Choices, consisting of facilitated discussions lasting between 60 and 90 minutes between patients and their surrogates, increased surrogates’ knowledge of patients’ preferences and reduced caregiver stress.<sup>6,7</sup> The PREPARE website, a self-administered tool providing step-by-step processes for ACP supplemented with video stories and modeling of behaviors, increased ACP documentation.<sup>8</sup> Additional approaches may be necessary to bridge the gap between intensive clinician-led and self-administered tools for ACP engagement. For example, efforts to replicate and disseminate the Respecting Choices program in a large metropolitan area required “concerted and sustained leadership,” a prolonged planning phase and the subsidizing of salaries.<sup>9</sup> This experience suggests that intensive programs are best targeted to selected patients at high risk of facing difficult treatment choices. The IOM report supports such targeting, suggesting a lifespan approach to ACP, beginning early with broad considerations of wishes that become more clinical and detailed over time. This lifespan strategy is congruent with our approach, which is designed to promote widespread dissemination of material that engages individuals in mid-life and works to give them the tools to

1  
2  
3 help them reconsider their wishes over time as health challenges become clearer. While the  
4 PREPARE website provides a thorough introduction to ACP, over 50% of participants had no  
5 access to the internet, and the website was viewed in research offices,<sup>8</sup> suggesting that web-  
6 based materials may have limited outreach.  
7  
8  
9

10  
11 The STAMP (Sharing and Talking about My Preferences) study was designed to address  
12 gaps in the existing programs for promoting participation in ACP. The STAMP interventions are  
13 based on the conceptual model of ACP considered as a set of inter-related health behaviors.<sup>10</sup>  
14 Prior research has demonstrated that participants have variable readiness to engage in ACP  
15 behaviors,<sup>10</sup> and that this readiness can be represented and explained by constructs of the  
16 Transtheoretical Model (TTM), including stages of change, decisional balance (the pros and  
17 cons of behavior change) and processes of change.<sup>11</sup> Readiness is also explained by a  
18 construct of values/beliefs. Unlike the pros and cons, which are factually verifiable, values and  
19 beliefs consist of common misperceptions about ACP and religious values that can function as  
20 barriers to ACP.<sup>11</sup>  
21  
22  
23  
24  
25  
26  
27  
28  
29  
30  
31

32 STAMP evaluates three behavior-change approaches to promoting ACP engagement. The  
33 first is the use of individualized feedback reports with stage-matched brochures.<sup>12</sup> The second is  
34 telephone-delivered motivational interviewing (MI), and the third is telephone-delivered  
35 motivational enhancement therapy (MET), a combination of written feedback and MI. The health  
36 behaviors consist of: a) identifying a trusted individual to act as a surrogate decision maker or  
37 healthcare agent; b) communicating with this person about goals, preferences, and values; c)  
38 completing advance directives (formal assignment of healthcare agent and living will); d)  
39 ensuring both that the physician is aware of documents and that documents are in the medical  
40 record. STAMP consists of two related randomised controlled trials (RCTs). The hypothesis is  
41 that individuals receiving each of the behavior change approaches will be more likely than  
42 individuals receiving usual care to complete all of the health behaviors.  
43  
44  
45  
46  
47  
48  
49  
50  
51  
52  
53  
54  
55  
56  
57  
58  
59  
60

## METHODS AND ANALYSIS

### Study overview:

STAMP consists of two related randomised controlled trials (RCTs), with shared inclusion and exclusion criteria for study participation, measures, outcomes, and analytic approaches but with enrollment procedures and interventions adapted for each of the two trials. Each RCT will test the efficacy of one or more interventions on the proportion of study participants who complete participation in ACP compared to usual care. One RCT is being conducted within the primary care clinics of the Veterans Affairs Connecticut Healthcare System (subsequently referred to as the VA study) and the second is in community-based primary care practices and senior living communities in the greater New Haven area (subsequently referred to as the community study). Trial registration data are provided in Table 1.

### Participants, recruitment, and enrollment:

Inclusion criteria include: age 55 years or older, and, for participants recruited in the VA study, having a primary care clinic visit within the last twelve months. Exclusion criteria include: severe hearing or vision loss, moderate-to-severe cognitive impairment identified by chart review (VA study only), physician diagnosis, Brief Orientation Memory Concentration test score  $> 10^{13}$  or inability to participate in the process of informed consent; primary language other than English; active psychiatric illness (current symptoms of depression, anxiety, substance abuse, or psychosis), no regular access to a telephone; no permanent mailing address; completion of all four ACP behaviors; or lack of physician permission for participation.

Screening, recruitment, and enrollment for participants differs according to study. In the VA study, potential participants are selected from a list obtained under a Health Insurance Portability and Accountability Act waiver of all persons age 55 and older who have had a primary care visit within the last year at VA Connecticut. This method of identifying participants accomplishes two objectives. First, it facilitates oversampling of women and minorities to ensure adequate representation in the study population. The study is aiming for 25% women and 40%



1  
2  
3 non-white participants. Second, it allows for all study procedures to be done by telephone.  
4  
5 Veterans relying on public transportation face a significant barrier to access, with only 25%  
6  
7 living within a 60-minute transit time from a VA medical facility.<sup>14</sup> The ability to identify  
8  
9 individuals and deliver the intervention by telephone is in keeping with the VA's investment in  
10  
11 telehealth to improve access to a variety of services.<sup>15</sup> Chart screens are performed to identify  
12  
13 exclusion criteria. Potentially eligible participants are sent an opt-out letter. If they do not opt out,  
14  
15 a research assistant calls the participant to explain the study and completes the screening for  
16  
17 eligibility. If the participant is eligible and interested in participation, a process of verbal assent is  
18  
19 obtained. Participants who are randomised to MI or MET are asked if they have a surrogate  
20  
21 they would like to include in their MI/MET session. If they do, they are asked to provide the  
22  
23 contact information for the surrogate, who must then provide verbal assent prior to inclusion in  
24  
25 the session. All identifiable data are stored separately from study records, which are identified  
26  
27 by code number, in access-restricted database files behind institutional firewalls. Printed  
28  
29 records are kept in locked offices.  
30  
31

32  
33 Recruitment in the community study is designed to encourage ACP as a part of routine  
34  
35 healthcare. In community practices, the list of patients scheduled for either well patient or  
36  
37 routine follow-up visits is reviewed prior to each clinic session to identify potentially eligible  
38  
39 participants. These individuals are given an information sheet to read prior to the encounter.  
40  
41 The clinician confirms patient interest in the study, and willing individuals meet with a research  
42  
43 assistant at the end of the encounter to complete a process of written informed consent. In  
44  
45 senior living communities, recruitment takes place both in the on-site medical clinics as  
46  
47 described above and among the community as a whole. For the latter, the study is introduced in  
48  
49 a talk given by the principal investigator, followed by the opportunity for volunteers to sign up for  
50  
51 times to meet with the research assistant to complete written informed consent.  
52  
53  
54  
55  
56  
57  
58  
59  
60

## Intervention and control conditions

Similar to recruitment procedures, the intervention arms are tailored to take advantage of the opportunities offered by the different study settings. The availability of health psychologists and MI training at the VA supported the strategy of developing MI interventions to promote ACP engagement in addition to a computer-tailored intervention that generates printed feedback. Therefore, in the VA study, there are four arms: computer-tailored intervention (CTI), MI, MET, and control. In the community, there are two arms: CTI and control. All arms consist of contact at baseline, two months, and four months with delivery of the intervention according to assignment. There is a contact at six months for final assessment.

### CTI

The development of the CTI has been previously described.<sup>12</sup> Briefly, it is an expert system (a software system consisting of an assessment battery, normative data to make comparisons, decision rules for delivering feedback, and feedback components) based on the TTM. TTM intervention principles include respecting and reflecting individuals' stages of change and their progress over time on each construct in individualized feedback reports. Such reports have been found to be effective across a wide range of other health behaviors.<sup>16</sup> The system assesses key constructs of the TTM, including stage of change (readiness to participate in each of the ACP behaviors), decisional balance, values/beliefs, and processes of change. The original system consisted of feedback paragraphs developed for each stage of the four ACP behaviors and for decisional balance, which are pulled into a templated cross-sectional, or "normative," report. For this study, the system was further developed in order to give feedback based on simultaneous consideration of stage for all four behaviors (referred to as stage pattern) as well as to give longitudinal feedback by comparing stage at follow-up to stage at baseline ("ipsative" reporting). Each feedback report consists of: 1) introduction to ACP (common across reports); 2) figure illustrating stage of change for each behavior (normative) and changes in stage at follow-up (ipsative) (see figure 1); 3) brief stage pattern-tailored

1  
2  
3 feedback; 4) feedback for up to three endorsed values/beliefs items; 5) decisional balance by  
4 stage pattern feedback; 6) processes/strategies/efficacy or “next steps” stage pattern-tailored  
5 feedback; 7) summary. For participants in the earliest stages of change for multiple behaviors,  
6 the report provides brief “next steps” focused on activities to help promote favorable attitudes  
7 toward ACP. For participants in later stages, the report provides suggestions for how the  
8 participant can go about engaging in the behavior. The “next steps” section also informs  
9 participants how completing one ACP behavior can help in the completion of others.  
10  
11  
12  
13  
14  
15  
16  
17

18 The feedback reports make reference to one of two stage-matched brochures. Each of  
19 these brochures provides additional details of ACP. The first brochure, provided to participants  
20 who have not yet completed any of the ACP behaviors, provides additional information  
21 promoting the reasons for engaging in ACP and addressing potential barriers. It also contains  
22 two stories describing families who did and did not engage in ACP. The second brochure,  
23 provided to participants who have completed at least one ACP behavior, also contains  
24 additional information about how to engage in each. In addition, this brochure contains either  
25 the VA or state of Connecticut Advance Directives Form. Finally, participants receive a four-fold  
26 pamphlet designed to be given to potential surrogate decision makers in order to explain their  
27 role in ACP.  
28  
29  
30  
31  
32  
33  
34  
35  
36  
37  
38

39 For participants enrolled in the VA, the assessment occurs by telephone and the feedback  
40 report, brochure, and pamphlet are mailed. For participants enrolled in the community, the initial  
41 assessment is done in person in the clinician office or private space in the senior living  
42 community, and the report is printed using a portable printer. If the participant does not have  
43 sufficient time after his/her appointment but has provided informed consent, the assessment is  
44 done by telephone at a later time. All follow-up assessments are done by telephone, with  
45 reports mailed to participants.  
46  
47  
48  
49  
50  
51  
52  
53  
54  
55  
56  
57  
58  
59  
60

## MI

The development of the MI protocol has been previously described.<sup>17</sup> MI sessions are conducted by health psychologists and social workers who have received training by Dr. Martino, a member of the research team and of the Motivational Interviewing Network of Trainers, who is an expert in training clinicians in the conduct of MI for clinical trials.<sup>18-20</sup> The training consisted of a two-day experiential workshop and STAMP MI/MET manual review, followed by supervised practice cases, incorporating fidelity rating-based feedback and coaching based on the review of audio recorded telephone sessions using the Independent Tape Rater Scale.<sup>21</sup> Dr. Martino reviewed and rated all practice cases for initial certification. Initial certification was defined as at least adequate or average adherence and competence ratings on three consecutive practice sessions. If a clinician's performance later drifts below the initial certification level during the trial, then Dr. Martino will provide additional supervision and training and assign another practice case if necessary. The MI intervention consists of four steps: 1) elicitation and clarification of patient's understanding of and current engagement in ACP; 2) building motivation for ACP; 3) developing a change plan; and 4) summarizing the overall discussion. The first step involves understanding in what ways the patient thinks ACP is important and the patient's knowledge of the four key ACP behaviors. Consistent with MI, the Elicit-Provide-Elicit approach is used to deliver ACP. This approach involves inviting the patient to share his/her knowledge, asking the patient permission to provide additional information, and then eliciting the patient's reaction to this new information. The second step consists of four activities that are utilized as needed. The first activity is an enhanced discussion of reasons to engage in ACP, with attention paid to developing the discrepancies between the most important reasons for engagement and lack of ACP participation. The second is addressing beliefs that serve as barriers to ACP. The third is an exercise to help patients clarify their values regarding quality versus quantity of life. Understanding how patients view this trade-off is central to decision making about potentially

1  
2  
3 life-sustaining treatment<sup>22</sup> and is included in a number of ACP tools<sup>23 24</sup> as well as in the  
4 brochure provided with CTI. The fourth activity is a discussion of experiences that could help  
5 ACP engagement. If the participant has a surrogate who agrees to be part of the MI, the  
6 surrogate's perspectives are elicited in each of these steps. In pilot-testing, sessions lasted a  
7 mean (SD) of 34.9 (6.5) minutes.  
8  
9  
10  
11  
12

### 13 MET

14  
15 In the MET arm, participants are provided the CTI TTM-based feedback materials, and then  
16 engage in a MI interview as described above, with the addition of review of the materials with  
17 the clinician. Each component of the interview makes mention as appropriate to specific  
18 sections of the stage-matched brochures to address knowledge gaps and provide more  
19 information about reasons to engage in ACP and addressing ACP barriers. In an additional  
20 section of the interview specific to MET, the clinician reviews the personalized feedback report  
21 with the participant to facilitate the development of a change plan.  
22  
23  
24  
25  
26  
27  
28  
29

### 30 Control

31  
32 Participants in the control arm receive assessments at baseline, two, and four months but  
33 do not receive any additional information about ACP, other than that potentially provided in  
34 usual care. In order to minimize the effect of asking about ACP behaviors on participants'  
35 engagement in these behaviors, the control assessments conclude with questions about  
36 readiness to engage in and pros and cons of physical activity.  
37  
38  
39  
40  
41  
42

### 43 Randomisation

44  
45 Randomisation in the community trial is at the level of the practice/senior living community in  
46 order to avoid contamination. Contamination could occur if patients assigned to the intervention  
47 increased their clinicians' awareness of ACP, and then clinicians changed their behaviors  
48 towards other participants potentially assigned to the control group. Therefore, randomisation  
49 occurs within matched pairs of sites, instead of at the individual level. Sites are matched  
50 according to available data regarding characteristics most likely to be associated with ACP  
51  
52  
53  
54  
55  
56  
57  
58  
59  
60

1  
2  
3 participation. For clinical sites, this includes proportion of patients: age 55 years and older, non-  
4 white, and with Medicaid. For senior living communities, this includes type of community (e.g.  
5 continuing care retirement community) and, if applicable, type of contract (e.g. life care, fee-for-  
6 service). After matching, sites are randomised by means of computer-based random number  
7 generator.  
8  
9  
10  
11  
12

13 Because participants at the VA belong to a very large panel of providers, each of whom  
14 would have only a small number of patients in the study, randomisation is at the level of the  
15 patient. Number of ACP behaviors completed at baseline may be the single variable most highly  
16 associated with the likelihood of full ACP engagement, since engagement is cross-sectionally  
17 related to attitudes, beliefs, and processes related to ACP<sup>11</sup> and to a number of  
18 sociodemographic characteristics<sup>25</sup> and life experiences.<sup>26</sup> Therefore, in order to ensure  
19 balanced representation of number of ACP activities completed at baseline across the four  
20 study arms, participants are assigned using stratified permuted block randomisation with a block  
21 length of eight via a customized computer program that provides the assignment at the time of  
22 randomisation.  
23  
24  
25  
26  
27  
28  
29  
30  
31  
32  
33

### 34 **Blinding**

35  
36  
37 Participants are not blinded to their assignment. Research assistants are not blinded to  
38 participant assignment at interim time points since the assessment, as described below, differs  
39 slightly according to the assignment. However, blinded research assistants ascertain the  
40 primary study outcome at the six-month assessment.  
41  
42  
43  
44

### 45 **Measures**

46  
47 The *primary outcome* is having completed, or being in the action/maintenance stage as  
48 specified in the TTM, for all of the four key ACP behaviors at six months. The designation of  
49 action and maintenance was originally designed for behaviors that required ongoing effort, such  
50 as smoking cessation and exercise, and refer to how long ago the behavior was initiated. While  
51 there are activities that an individual can and should be doing during the maintenance phase of  
52  
53  
54  
55  
56  
57  
58  
59  
60

1  
2  
3 ACP, such as reviewing and updating documents, the focus for this study was on initial  
4 engagement in ACP. Therefore, these two stages were combined. The *secondary outcomes* are  
5 the stage of change for each of the behaviors. The stages of change prior to  
6 action/maintenance are: precontemplation, or not ready to take action within the next six  
7 months; contemplation, or thinking about taking action over the next six months; and  
8 preparation, or planning on taking action in the next thirty days. These variables are measured  
9 at each assessment: baseline, two months, four months, and six months.  
10  
11  
12  
13  
14  
15  
16  
17

18 Sociodemographic, health, and psychosocial status variables are assessed to describe the  
19 study population, test for the adequacy of randomisation, and use as covariates. The  
20 sociodemographic status variables include: age, gender, race/ethnicity, level of education,  
21 income, marital status, housing type, living alone or with others. The health status variables  
22 include: self-rated health,<sup>27</sup> self-rated quality of life, and variables included in a validated  
23 prognostic index for four-year mortality: current tobacco use, chronic conditions, and functional  
24 status.<sup>28</sup> The psychosocial status variables include: depression, measured using the PHQ-2;<sup>29</sup>  
25 and religion, measured using the Duke University Religion Index,<sup>30</sup> and experience with  
26 surrogate medical decision making.<sup>26</sup> These descriptive variables are measured at baseline  
27 only.  
28  
29  
30  
31  
32  
33  
34  
35  
36  
37  
38

39 Additional constructs of the TTM are being assessed both as input for the expert system and  
40 as variables to be used in TTM-based models of ACP as behavior change. These constructs  
41 are posited to be mediation variables in the pathway of behavior change and include decisional  
42 balance, values/beliefs, confidence, and processes of change.<sup>11</sup> ACP knowledge is also  
43 assessed as a potential mediator.<sup>25</sup> These variables are measured at each assessment.  
44  
45  
46  
47  
48  
49

50 The final six-month assessment includes additional evaluation measures, asking  
51 participants how much participation in the study: increased their own interest in ACP, the  
52 interest of a significant other in ACP, and was responsible for their own and/or a significant  
53 other's movement forward with ACP.  
54  
55  
56  
57  
58  
59  
60

1  
2  
3 In order to minimize missing data, a shortened form of the six-month assessment is  
4 available to those participants who do not want to complete a full assessment but are willing to  
5 answer an abbreviated set of items. This outcome assessment consists only of stage of change  
6 for the four ACP behaviors.  
7  
8  
9

10  
11 Participants recruited from community settings complete the baseline assessment as  
12 administered by a research assistant in person, unless they cannot stay after the appointment,  
13 in which case the assessment is completed by phone. They have the choice to complete follow-  
14 up assessments either by telephone or through self-administration. Both participants and  
15 research assistants access the assessment developed through the customization of TTMX,  
16 proprietary behavior change software licensed through Pro-Change Behavior Systems, Inc. The  
17 program is designed to support high-quality data collection by having respondents click on radio  
18 buttons next to responses to minimize data entry errors and not allowing respondents to leave a  
19 page until all questions are answered. Assessments can be completed up to seven days prior to  
20 or 30 days following the target date. Participants recruited from the VA complete all  
21 assessments by telephone.  
22  
23  
24  
25  
26  
27  
28  
29  
30  
31  
32  
33

### 34 **Analytic Plan**

35  
36 The analysis for the community study is based on the study design of two groups  
37 (intervention, control) assessed on four occasions (baseline, 2, 4, 6 months) with sites nested in  
38 groups based on cluster randomization of matched pairs of sites. Baseline analyses will include  
39 examination of group differences to evaluate the success of the matched-pairs randomization  
40 procedure and examination of potential covariates to reduce the expected within-groups  
41 dependency resulting from cluster randomization.  
42  
43  
44  
45  
46  
47  
48

49 The primary analysis will address the hypothesis that the proportion of participants in  
50 Action/Maintenance for the four ACP behaviors will be higher in the intervention group than in  
51 the control group at the six-month assessment. Several analytical approaches are available  
52 within a more general framework of random effects modeling incorporating both time and site  
53  
54  
55  
56  
57  
58  
59



1  
2  
3 level effects in addition to potentially important covariates. The basic analytical approach will  
4 employ the generalized estimating equation (GEE) method to analyze intervention main effects  
5 and interaction (additive) effects.<sup>31</sup> Analytic models will include interaction terms for time point  
6 and site. This will permit an examination of the effect of the intervention not only at the primary  
7 endpoint of six months, but also at the intermediate time points of two and four months.  
8  
9  
10  
11  
12

13 The analysis for the VA study is based on the study design of four groups assessed on four  
14 occasions. The primary analysis for this study will address the hypothesis that the proportions of  
15 participants in Action/Maintenance for the four ACP behaviors will be higher in each intervention  
16 group than in the control group at the six-month assessment. A logistic model that contains  
17 intervention group (CTI, MET, CTI+MET, with reference=control) as a categorical predictor will  
18 be utilized to analyze this outcome. The model will also control for the stratification variable  
19 (number of ACP activities completed at baseline) and for any factors found to be unbalanced  
20 across groups. Pre-specified subgroup analyses will be conducted by using the same logistic  
21 modeling approach within each of the strata. Although the study is not powered to find  
22 significant differences between intervention arms or within strata, the study will provide  
23 preliminary data for future studies regarding the effect sizes for each intervention arm and  
24 potential differences in effectiveness within subgroups.  
25  
26  
27  
28  
29  
30  
31  
32  
33  
34  
35  
36  
37  
38

39 Analytic approaches for secondary outcomes will follow the same plan in both studies and  
40 be similar to those employed for the primary outcome variable. Both categorical and continuous  
41 secondary outcomes will be examined, including specific behavioral and intermediate outcome  
42 measures, such as the number of ACP behaviors changed and ACP attitudes. For continuous  
43 measures, MANOVA, structural equation modeling, latent growth curve modeling, and GEE  
44 techniques will be utilized. For categorical measures, latent transition analysis, logistic  
45 regression, and GEE techniques will be used. For skewed frequency/count data, appropriate  
46 data transformation or Poisson regression approaches can be employed. Secondary analyses  
47 will also examine the nature of behavior change within and across groups over time within the  
48  
49  
50  
51  
52  
53  
54  
55  
56  
57  
58  
59  
60

1  
2  
3 framework of multilevel structural equation modeling (SEM), including latent growth curve  
4 modeling, mediation modeling, cross-lagged panel designs, and model invariance testing.<sup>32-36</sup>  
5  
6 These analyses will examine the relationships between intervention, mediator and moderator  
7 process measures. These analyses will provide considerable insight into how the interventions  
8 may be effecting change and will be especially helpful for continued development and  
9 refinement of the intervention. Mediation analysis in the control group will focus on how TTM  
10 constructs predict longitudinal adoption of ACP. Mediation analysis in the intervention group(s)  
11 will focus on how the TTM constructs and other sociodemographic factors compare as  
12 mediators of effective interventions. Because these modeling approaches can be complex, they  
13 will proceed in stepwise fashion systematically adding constructs and time points to more basic  
14 models to ensure model convergence. Models are built from the simplest to the most complex  
15 that the data and theory can support, using robust estimation methods and bias-corrected  
16 bootstrapping strategies for final model estimation and hypothesis testing.  
17  
18  
19  
20  
21  
22  
23  
24  
25  
26  
27  
28  
29

### 30 **Sample size**

31  
32 The sample size calculation for the community-based study was complicated by the use of  
33 practice site as the unit of treatment assignment and analysis, which introduces an unknown  
34 degree of dependency into the data. This dependency, or intraclass correlation (ICC) was  
35 conservatively assumed to be ICC = .05 based on existing cross-sectional data,<sup>25</sup> without  
36 covariate adjustment.  
37  
38  
39  
40  
41  
42

43 This cross-sectional data also provided an estimate of the prevalence of the primary  
44 outcome of between 4 and 8%.<sup>25</sup> We conservatively estimated that the prevalence of this  
45 outcome in the control group, which, because of our exclusion criteria, will be 0% at baseline,  
46 will be 5% at the six-month assessment. The sample size is based on the ability to detect an  
47 absolute increase of 10% for the primary outcome in the treatment group over the control group,  
48 consistent with effect sizes in previous TTM-tailored interventions and a judgment regarding a  
49 minimum clinically significant effect size. Sample size calculations assumed one-tailed  
50  
51  
52  
53  
54  
55  
56  
57  
58  
59  
60

1  
2  
3 significance testing at  $\alpha = .05$  and were based on a one-way analysis of variance for  
4 proportions with arcsine transformation and nested random effects for sites to accommodate the  
5 cluster-randomised design.<sup>37</sup> Based on an enrollment of a minimum of 16 sites for the study (8  
6 matched pairs), to achieve power of .80 for the primary outcome, a final sample size of 50  
7 individuals per site is needed, resulting in a final study sample size of 800. Assuming 20% loss  
8 to follow-up, we estimate that a baseline sample size of 1000 for the community sample is  
9 required.  
10  
11  
12  
13  
14  
15  
16  
17

18 In the VA study, using the same estimates of 5% prevalence of the primary outcome in the  
19 control group, a sample size of 110 per group is required to detect an absolute increase of 10%  
20 for the primary outcome in each of the intervention groups to achieve a power of .80 with an  
21  $\alpha = .05$ . Based on prior experience within VA samples, a lower 10% loss to follow-up was  
22 assumed, resulting in a baseline sample size of 121 per group, for a total of 484.  
23  
24  
25  
26  
27

## 28 **ETHICS AND DISSEMINATION**

### 29 **Ethics**

30  
31  
32 The protocol<sup>7</sup> was reviewed and approved by the Institutional Review Boards of Bridgeport  
33 Hospital, which has governance over the majority of the community clinical sites participating in  
34 the study and the Yale School of Medicine, which has governance over the remaining  
35 community sites, and the Human Subjects Subcommittee of VA Connecticut Healthcare  
36 System. The study is being monitored with the use of a Safety Monitoring Committee. Members  
37 of this committee, with expertise in clinical geriatrics and study conduct, have reviewed and  
38 approved all study protocols and materials. Quarterly meetings occur to review any adverse  
39 events.  
40  
41  
42  
43  
44  
45  
46  
47  
48

### 49 **Dissemination**

50  
51 The results of the study will be presented to academic audiences through presentations at  
52 national meetings and publication in peer-reviewed journals. The principal investigator has  
53  
54  
55  
56  
57  
58  
59  
60

1  
2  
3 partnered with leadership in both the community and VA settings, with ongoing discussion of  
4  
5 how the STAMP interventions can be implemented, if shown to be efficacious.  
6  
7  
8  
9  
10  
11  
12  
13  
14  
15  
16  
17  
18  
19  
20  
21  
22  
23  
24  
25  
26  
27  
28  
29  
30  
31  
32  
33  
34  
35  
36  
37  
38  
39  
40  
41  
42  
43  
44  
45  
46  
47  
48  
49  
50  
51  
52  
53  
54  
55  
56  
57  
58  
59  
60

For peer review only

## REFERENCES

1. Institute of Medicine. Dying in America: Improving and honoring individual preferences near the end of life. Washington, DC: The National Academies Press 2014.
2. Chiarchiaro J, Buddadhumaruk P, Arnold RM, et al. Prior advance care planning is associated with less decisional conflict among surrogates for critically ill patients. *Ann Am Thorac Soc* 2015;12(10):1528-33. doi: 10.1513/AnnalsATS.201504-253OC
3. Wright AA, Zhang B, Ray A, et al. Associations between end-of-life discussions, patient mental health, medical care near death, and caregiver bereavement adjustment. *JAMA* 2008;300(14):1665-73.
4. Yadav KN, Gabler NB, Cooney E, et al. Approximately one in three US adults completes any type of advance directive for end-of-life care. *Health Aff (Millwood)* 2017;36(7):1244-51. doi: 10.1377/hlthaff.2017.0175
5. Sudore RL, Fried TR. Redefining the "planning" in advance care planning: preparing for end-of-life decision making. *Ann Intern Med* 2010;153(4):256-61.
6. Detering KM, Hancock AD, Reade MC, et al. The impact of advance care planning on end of life care in elderly patients: randomised controlled trial. *BMJ* 2010;340:c1345.
7. Kirchhoff KT, Hammes BJ, Kehl KA, et al. Effect of a disease-specific planning intervention on surrogate understanding of patient goals for future medical treatment. *J Am Geriatr Soc* 2010;58(7):1233-40.
8. Sudore RL, Boscardin J, Feuz MA, et al. Effect of the PREPARE website vs an easy-to-read advance directive on advance care planning documentation and engagement among veterans: A randomized clinical trial. *JAMA Intern Med* 2017;177(8):1102-09. doi: 10.1001/jamainternmed.2017.1607
9. Wilson KS, Kottke TE, Schettle S. Honoring Choices Minnesota: Preliminary data from a community-wide advance care planning model. *J Am Geriatr Soc* 2014;62(12):2420-25. doi: 10.1111/jgs.13136

- 1  
2  
3 10. Fried TR, Bullock K, Iannone L, et al. Understanding advance care planning as a process of  
4  
5 health behavior change. *J Am Geriatr Soc* 2009;57(9):1547-55.  
6
- 7 11. Fried TR, Redding CA, Robbins ML, et al. Promoting advance care planning as health  
8  
9 behavior change: Development of scales to assess Decisional Balance, Medical and  
10  
11 Religious Beliefs, and Processes of Change. *Patient Educ Couns* 2012;86(1):25-32.  
12
- 13 12. Fried TR, Redding CA, Robbins ML, et al. Development of personalized health messages to  
14  
15 promote engagement in advance care planning. *J Am Geriatr Soc* 2016;64(2):359-64.  
16
- 17 13. Katzman R, Brown T, Fuld P, et al. Validation of a short Orientation-Memory-Concentration  
18  
19 Test of cognitive impairment. *Am J Psychiatry* 1983;140(6):734-9. doi:  
20  
21 10.1176/ajp.140.6.734 [published Online First: 1983/06/01]  
22  
23
- 24 14. Farmer CM, Hosek SD, Adamson DM. Balancing demand and supply for Veterans' health  
25  
26 care: a summary of three RAND assessments conducted under the Veterans Choice  
27  
28 Act. *Rand Health Quarterly* 2016;6(1):12.  
29
- 30 15. U.S. Department of Veterans Affairs. VA Telehealth Services [Available from:  
31  
32 <https://www.telehealth.va.gov>] accessed April 20, 2018.  
33  
34
- 35 16. Baban A, Craciun C. Changing health-risk behaviors: A review of theory and evidence-  
36  
37 based interventions in health psychology. *J Cogn Behav Psychother* 2007;7(1)  
38
- 39 17. Fried TR, Leung SL, Blakley LA, et al. Development and pilot testing of a motivational  
40  
41 interview for engagement in advance care planning. *J Palliat Med* 2018;21(7):897-98.  
42  
43 doi: 10.1089/jpm.2018.0095  
44
- 45 18. Ball SA, Martino S, Nich C, et al. Site matters: Multisite randomized trial of motivational  
46  
47 enhancement therapy in community drug abuse clinics. *J Consult Clin Psychol*  
48  
49 2007;75(4):556.  
50
- 51 19. Carroll KM, Ball SA, Nich C, et al. Motivational interviewing to improve treatment  
52  
53 engagement and outcome in individuals seeking treatment for substance abuse: A  
54  
55 multisite effectiveness study. *Drug Alcohol Depend* 2006;81(3):301-12.  
56  
57  
58  
59  
60

- 1  
2  
3 20. Martino S, Paris M, Jr., Anez L, et al. The effectiveness and cost of clinical supervision for  
4  
5 motivational interviewing: A randomized controlled trial. *J Subst Abuse Treat*  
6  
7 2016;68:11-23. doi: 10.1016/j.jsat.2016.04.005 [published Online First: 2016/07/20]  
8
- 9 21. Ball S, Martino S, Corvino J, et al. Independent Tape Rater Guide. Unpublished  
10  
11 psychotherapy tape rating manual, 2002.  
12
- 13 22. Heyland DK, Pichora D, Dodek P, et al. The development and validation of a questionnaire  
14  
15 to audit advance care planning. *J Palliat Care Med* 2012;2:119. doi: 10.4172/2165-  
16  
17 7386.1000119  
18
- 19 23. Green MJ, Levi BH. Development of an interactive computer program for advance care  
20  
21 planning. *Health Expect* 2009;12(1):60-69.  
22  
23
- 24 24. Sudore RL, Knight SJ, McMahan RD, et al. A novel website to prepare diverse older adults  
25  
26 for decision making and advance care planning: A pilot study. *J Pain Symptom Manage*  
27  
28 2014;47(4):674-86. doi: <http://dx.doi.org/10.1016/j.jpainsymman.2013.05.023>  
29
- 30 25. Fried TR, Redding CA, Robbins ML, et al. Stages of change for the component behaviors of  
31  
32 advance care planning. *J Am Geriatr Soc* 2010;58(12):2329-36.  
33
- 34 26. Amjad H, Towle V, Fried T. Association of experience with illness and end-of-life care with  
35  
36 advance care planning in older adults. *J Am Geriatr Soc* 2014;62(7):1304-09. doi:  
37  
38 10.1111/jgs.12894  
39
- 40 27. Idler EL, Benyamini Y. Self-rated health and mortality: a review of twenty-seven community  
41  
42 studies. *J Health Soc Behav* 1997;38(1):21-37.  
43  
44
- 45 28. Lee SJ, Lindquist K, Segal MR, et al. Development and validation of a prognostic index for  
46  
47 4-year mortality in older adults. *JAMA* 2006;295(7):801-08. doi: 10.1001/jama.295.7.801  
48
- 49 29. Kroenke K, Spitzer RL, Williams JB. The Patient Health Questionnaire-2: validity of a two-  
50  
51 item depression screener. *Med Care* 2003;41(11):1284-92.  
52
- 53 30. Koenig HG, Büssing A. The Duke University Religion Index (DUREL): A five-item measure  
54  
55 for use in epidemiological studies. *Religions* 2010;1(1):78-85.  
56  
57  
58  
59

- 1  
2  
3 31. Zeger SL, Liang KY. Longitudinal data analysis for discrete and continuous outcomes.  
4  
5 *Biometrics* 1986;42(1):121-30.  
6  
7 32. Fairchild AJ, MacKinnon DP. A general model for testing mediation and moderation effects.  
8  
9 *Prevent Sci* 2009;10(2):87-99.  
10  
11 33. Kaplan D. Structural Equation Modeling: Foundations and Extensions (2nd ed). Thousand  
12  
13 Oaks, CA: Sage 2009.  
14  
15 34. Kline RB. Principles and Practice of Structural Equation Modeling (4th ed). New York:  
16  
17 Guilford Press 2016.  
18  
19 35. MacKinnon DP, Fairchild AJ, Fritz MS. Mediation analysis. *Annu Rev Psychol* 2007;58:593.  
20  
21 36. Rabe-Hesketh S, Skrondal A, Zheng X. Multilevel structural equation modeling. In: Lee S-Y,  
22  
23 ed. Handbook of Computing and Statistics with Applications: Vol 1. Amsterdam: Elsevier  
24  
25 2007.  
26  
27 37. Rossi JS. Statistical power analysis. In: Schinka JA, Velicer WF, eds. Handbook of  
28  
29 Psychology Volume 2: Research Methods in Psychology, 2nd ed. New York: John Wiley  
30  
31 & Sons 2013:71-108.  
32  
33  
34  
35  
36  
37  
38  
39  
40  
41  
42  
43  
44  
45  
46  
47  
48  
49  
50  
51  
52  
53  
54  
55  
56  
57  
58  
59  
60



## **AUTHORS' CONTRIBUTIONS**

Study design: TRF, SM, CAR, AP, JSR    Study conduct: TRF, SM, LI, MZ, LAB, JOL  
Development of interventions: TRF, SM, CAR, AP, LI, MZ, LAB, JOL    Drafting of manuscript:  
TRF    Review of manuscript for critical revisions: all authors    Approval of final manuscript:  
all authors

The views expressed in this article are those of the authors and do not necessarily represent the views of the Department of Veterans Affairs.

## **FUNDING STATEMENT:**

This work is supported by the National Institute of Nursing Research (R01 NR016007), VA Health Services and Research (I01 HX002062), National Institute of Aging (P30 AG21342), and National Center for Research Resources (G20 RR030883). The funders have no role in the study design, collection, management, analysis, and interpretation of data; writing of the report; or the decision to submit the report for publication.

## **COMPETING INTERESTS:**

None declared.

Table 1: Trial registration data

| Category                                      | STAMP (Community)                                                                                                                                                                                                                                                                             | STAMP (VA)                                                              |
|-----------------------------------------------|-----------------------------------------------------------------------------------------------------------------------------------------------------------------------------------------------------------------------------------------------------------------------------------------------|-------------------------------------------------------------------------|
| Primary registry and trial identifying number | ClinicalTrials.gov<br>NCT03103828                                                                                                                                                                                                                                                             | ClinicalTrials.gov<br>NCT03137459                                       |
| Date of registration in primary registry      | 04/27/2017                                                                                                                                                                                                                                                                                    | 03/31/2017                                                              |
| Source(s) of monetary or material support     | NIH/NINR<br>NIH/NIA                                                                                                                                                                                                                                                                           | VA HSR&D                                                                |
| Primary sponsor                               | NIH/NINR                                                                                                                                                                                                                                                                                      | VA HSR&D                                                                |
| Secondary sponsor                             | None                                                                                                                                                                                                                                                                                          | None                                                                    |
| Contact for public queries                    | Lynne Iannone, MS: lynne.iannone@yale.edu                                                                                                                                                                                                                                                     |                                                                         |
| Contact for scientific queries                | Terri Fried, MD: terri.fried@yale.edu                                                                                                                                                                                                                                                         |                                                                         |
| Public title                                  | STAMP: Sharing and Talking about My Preferences                                                                                                                                                                                                                                               |                                                                         |
| Scientific title                              | STAMP: Sharing and Talking about My Preferences                                                                                                                                                                                                                                               |                                                                         |
| Countries of recruitment                      | USA                                                                                                                                                                                                                                                                                           | USA                                                                     |
| Health condition(s) or problem(s) studied     | Advance care planning (ACP)                                                                                                                                                                                                                                                                   |                                                                         |
| Intervention(s)                               | Active comparator: TTM-based CTI; No intervention: usual care                                                                                                                                                                                                                                 | Active comparators: TTM-based CTI, MI, MET; No intervention: usual care |
| Key inclusion and exclusion criteria          | Inclusion: age 55 and older and belonging to healthcare system or residential community. Exclusion: severe hearing impairment, severe visual, moderate to severe cognitive impairment, primary language other than English, active psychiatric illness, completion of all 4 key ACP behaviors |                                                                         |
| Study type                                    | Interventional; allocation: randomised; intervention model: parallel assignment; masking: single masking (outcomes assessor), primary purpose: health services research                                                                                                                       |                                                                         |
| Date of first enrolment                       | July 2017                                                                                                                                                                                                                                                                                     | October 2017                                                            |
| Target sample size                            | 1000                                                                                                                                                                                                                                                                                          | 484                                                                     |
| Recruitment status                            | Recruiting                                                                                                                                                                                                                                                                                    |                                                                         |
| Primary outcome(s)                            | Completion of four key ACP behaviors                                                                                                                                                                                                                                                          |                                                                         |
| Key secondary outcomes                        | Stage of change for each of the four key ACP behaviors                                                                                                                                                                                                                                        |                                                                         |

NIH = National Institutes of Health; NINR = National Institute of Nursing Research; NIA = National Institute on Aging; VA = Veterans Affairs; HSR&D = Health Services Research and Delivery; TTM = Transtheoretical Model; CTI = computer-tailored intervention; MI = motivational interviewing; MET = motivational enhancement therapy

# Reporting checklist for protocol of a clinical trial.

Based on the SPIRIT guidelines.

## Instructions to authors

Complete this checklist by entering the page numbers from your manuscript where readers will find each of the items listed below.

Your article may not currently address all the items on the checklist. Please modify your text to include the missing information. If you are certain that an item does not apply, please write "n/a" and provide a short explanation.

Upload your completed checklist as an extra file when you submit to a journal.

In your methods section, say that you used the SPIRIT reporting guidelines, and cite them as:

Chan A-W, Tetzlaff JM, Altman DG, Laupacis A, Gøtzsche PC, Krleža-Jerić K, Hróbjartsson A, Mann H, Dickersin K, Berlin J, Doré C, Parulekar W, Summerskill W, Groves T, Schulz K, Sox H, Rockhold FW, Rennie D, Moher D. SPIRIT 2013 Statement: Defining standard protocol items for clinical trials. *Ann Intern Med.* 2013;158(3):200-207

|                                             |     | Reporting Item                                                                                               | Page Number |
|---------------------------------------------|-----|--------------------------------------------------------------------------------------------------------------|-------------|
| Title                                       | #1  | Descriptive title identifying the study design, population, interventions, and, if applicable, trial acronym | 1           |
| Trial registration                          | #2a | Trial identifier and registry name. If not yet registered, name of intended registry                         | 3           |
| Trial registration: data set                | #2b | All items from the World Health Organization Trial Registration Data Set                                     | 23          |
| Protocol version                            | #3  | Date and version identifier                                                                                  | NA          |
| Funding                                     | #4  | Sources and types of financial, material, and other support                                                  | 22          |
| Roles and responsibilities: contributorship | #5a | Names, affiliations, and roles of protocol contributors                                                      | 22          |
| Roles and responsibilities:                 | #5b | Name and contact information for the trial sponsor                                                           | 22          |

|    |                      |      |                                                                   |      |
|----|----------------------|------|-------------------------------------------------------------------|------|
| 1  | sponsor contact      |      |                                                                   |      |
| 2  | information          |      |                                                                   |      |
| 3  |                      |      |                                                                   |      |
| 4  | Roles and            | #5c  | Role of study sponsor and funders, if any, in study design;       | 22   |
| 5  | responsibilities:    |      | collection, management, analysis, and interpretation of           |      |
| 6  | sponsor and funder   |      | data; writing of the report; and the decision to submit the       |      |
| 7  |                      |      | report for publication, including whether they will have          |      |
| 8  |                      |      | ultimate authority over any of these activities                   |      |
| 9  |                      |      |                                                                   |      |
| 10 |                      |      |                                                                   |      |
| 11 |                      |      |                                                                   |      |
| 12 | Roles and            | #5d  | Composition, roles, and responsibilities of the coordinating      | NA   |
| 13 | responsibilities:    |      | centre, steering committee, endpoint adjudication                 |      |
| 14 | committees           |      | committee, data management team, and other individuals or         |      |
| 15 |                      |      | groups overseeing the trial, if applicable (see Item 21a for      |      |
| 16 |                      |      | data monitoring committee)                                        |      |
| 17 |                      |      |                                                                   |      |
| 18 |                      |      |                                                                   |      |
| 19 |                      |      |                                                                   |      |
| 20 | (Background and      | #6a  | Description of research question and justification for            | 4    |
| 21 | rationale            |      | undertaking the trial, including summary of relevant studies      |      |
| 22 |                      |      | (published and unpublished) examining benefits and harms          |      |
| 23 |                      |      | for each intervention                                             |      |
| 24 |                      |      |                                                                   |      |
| 25 |                      |      |                                                                   |      |
| 26 |                      |      |                                                                   |      |
| 27 | Background and       | #6b  | Explanation for choice of comparators                             | 5    |
| 28 | rationale: choice of |      |                                                                   |      |
| 29 | comparators          |      |                                                                   |      |
| 30 |                      |      |                                                                   |      |
| 31 |                      |      |                                                                   |      |
| 32 | Objectives           | #7   | Specific objectives or hypotheses                                 | 5    |
| 33 |                      |      |                                                                   |      |
| 34 |                      |      |                                                                   |      |
| 35 | Trial design         | #8   | Description of trial design including type of trial (eg, parallel | 5-6  |
| 36 |                      |      | group, crossover, factorial, single group), allocation ratio,     |      |
| 37 |                      |      | and framework (eg, superiority, equivalence, non-inferiority,     |      |
| 38 |                      |      | exploratory)                                                      |      |
| 39 |                      |      |                                                                   |      |
| 40 |                      |      |                                                                   |      |
| 41 |                      |      |                                                                   |      |
| 42 | Study setting        | #9   | Description of study settings (eg, community clinic,              | 6    |
| 43 |                      |      | academic hospital) and list of countries where data will be       |      |
| 44 |                      |      | collected. Reference to where list of study sites can be          |      |
| 45 |                      |      | obtained                                                          |      |
| 46 |                      |      |                                                                   |      |
| 47 |                      |      |                                                                   |      |
| 48 | Eligibility criteria | #10  | Inclusion and exclusion criteria for participants. If applicable, | 6    |
| 49 |                      |      | eligibility criteria for study centres and individuals who will   |      |
| 50 |                      |      | perform the interventions (eg, surgeons, psychotherapists)        |      |
| 51 |                      |      |                                                                   |      |
| 52 |                      |      |                                                                   |      |
| 53 |                      |      |                                                                   |      |
| 54 | Interventions:       | #11a | Interventions for each group with sufficient detail to allow      | 7-10 |
| 55 | description          |      | replication, including how and when they will be                  |      |
| 56 |                      |      | administered                                                      |      |
| 57 |                      |      |                                                                   |      |
| 58 |                      |      |                                                                   |      |
| 59 |                      |      |                                                                   |      |
| 60 |                      |      |                                                                   |      |

|    |                      |      |                                                                  |       |
|----|----------------------|------|------------------------------------------------------------------|-------|
| 1  | Interventions:       | #11b | Criteria for discontinuing or modifying allocated                | NA    |
| 2  | modifications        |      | interventions for a given trial participant (eg, drug dose       |       |
| 3  |                      |      | change in response to harms, participant request, or             |       |
| 4  |                      |      | improving / worsening disease)                                   |       |
| 5  |                      |      |                                                                  |       |
| 6  |                      |      |                                                                  |       |
| 7  |                      |      |                                                                  |       |
| 8  | Interventions:       | #11c | Strategies to improve adherence to intervention protocols,       | NA    |
| 9  | adherence            |      | and any procedures for monitoring adherence (eg, drug            |       |
| 10 |                      |      | tablet return; laboratory tests)                                 |       |
| 11 |                      |      |                                                                  |       |
| 12 |                      |      |                                                                  |       |
| 13 | Interventions:       | #11d | Relevant concomitant care and interventions that are             | NA    |
| 14 | concomitant care     |      | permitted or prohibited during the trial                         |       |
| 15 |                      |      |                                                                  |       |
| 16 |                      |      |                                                                  |       |
| 17 | Outcomes             | #12  | Primary, secondary, and other outcomes, including the            | 12-14 |
| 18 |                      |      | specific measurement variable (eg, systolic blood pressure),     |       |
| 19 |                      |      | analysis metric (eg, change from baseline, final value, time     |       |
| 20 |                      |      | to event), method of aggregation (eg, median, proportion),       |       |
| 21 |                      |      | and time point for each outcome. Explanation of the clinical     |       |
| 22 |                      |      | relevance of chosen efficacy and harm outcomes is strongly       |       |
| 23 |                      |      | recommended                                                      |       |
| 24 |                      |      |                                                                  |       |
| 25 |                      |      |                                                                  |       |
| 26 |                      |      |                                                                  |       |
| 27 |                      |      |                                                                  |       |
| 28 | Participant timeline | #13  | Time schedule of enrolment, interventions (including any         | 8, 10 |
| 29 |                      |      | run-ins and washouts), assessments, and visits for               |       |
| 30 |                      |      | participants. A schematic diagram is highly recommended          |       |
| 31 |                      |      | (see Figure)                                                     |       |
| 32 |                      |      |                                                                  |       |
| 33 |                      |      |                                                                  |       |
| 34 |                      |      |                                                                  |       |
| 35 | Sample size          | #14  | Estimated number of participants needed to achieve study         | 16    |
| 36 |                      |      | objectives and how it was determined, including clinical and     |       |
| 37 |                      |      | statistical assumptions supporting any sample size               |       |
| 38 |                      |      | calculations                                                     |       |
| 39 |                      |      |                                                                  |       |
| 40 |                      |      |                                                                  |       |
| 41 |                      |      |                                                                  |       |
| 42 | Recruitment          | #15  | Strategies for achieving adequate participant enrolment to       | 6-7   |
| 43 |                      |      | reach target sample size                                         |       |
| 44 |                      |      |                                                                  |       |
| 45 |                      |      |                                                                  |       |
| 46 | Allocation: sequence | #16a | Method of generating the allocation sequence (eg,                | 11-12 |
| 47 | generation           |      | computer-generated random numbers), and list of any              |       |
| 48 |                      |      | factors for stratification. To reduce predictability of a random |       |
| 49 |                      |      | sequence, details of any planned restriction (eg, blocking)      |       |
| 50 |                      |      | should be provided in a separate document that is                |       |
| 51 |                      |      | unavailable to those who enrol participants or assign            |       |
| 52 |                      |      | interventions                                                    |       |
| 53 |                      |      |                                                                  |       |
| 54 |                      |      |                                                                  |       |
| 55 |                      |      |                                                                  |       |
| 56 |                      |      |                                                                  |       |
| 57 | Allocation           | #16b | Mechanism of implementing the allocation sequence (eg,           | 11-12 |
| 58 | concealment          |      | central telephone; sequentially numbered, opaque, sealed         |       |
| 59 |                      |      |                                                                  |       |
| 60 |                      |      |                                                                  |       |

|    |                        |      |                                                                |       |
|----|------------------------|------|----------------------------------------------------------------|-------|
| 1  | mechanism              |      | envelopes), describing any steps to conceal the sequence       |       |
| 2  |                        |      | until interventions are assigned                               |       |
| 3  |                        |      |                                                                |       |
| 4  | Allocation:            | #16c | Who will generate the allocation sequence, who will enrol      | 11-12 |
| 5  | implementation         |      | participants, and who will assign participants to              |       |
| 6  |                        |      | interventions                                                  |       |
| 7  |                        |      |                                                                |       |
| 8  |                        |      |                                                                |       |
| 9  | Blinding (masking)     | #17a | Who will be blinded after assignment to interventions (eg,     | 12    |
| 10 |                        |      | trial participants, care providers, outcome assessors, data    |       |
| 11 |                        |      | analysts), and how                                             |       |
| 12 |                        |      |                                                                |       |
| 13 |                        |      |                                                                |       |
| 14 | Blinding (masking):    | #17b | If blinded, circumstances under which unblinding is            | NA    |
| 15 | emergency              |      | permissible, and procedure for revealing a participant's       |       |
| 16 | unblinding             |      | allocated intervention during the trial                        |       |
| 17 |                        |      |                                                                |       |
| 18 |                        |      |                                                                |       |
| 19 |                        |      |                                                                |       |
| 20 | Data collection plan   | #18a | Plans for assessment and collection of outcome, baseline,      | 12-13 |
| 21 |                        |      | and other trial data, including any related processes to       |       |
| 22 |                        |      | promote data quality (eg, duplicate measurements, training     |       |
| 23 |                        |      | of assessors) and a description of study instruments (eg,      |       |
| 24 |                        |      | questionnaires, laboratory tests) along with their reliability |       |
| 25 |                        |      | and validity, if known. Reference to where data collection     |       |
| 26 |                        |      | forms can be found, if not in the protocol                     |       |
| 27 |                        |      |                                                                |       |
| 28 |                        |      |                                                                |       |
| 29 |                        |      |                                                                |       |
| 30 |                        |      |                                                                |       |
| 31 | Data collection plan:  | #18b | Plans to promote participant retention and complete follow-    | 13    |
| 32 | retention              |      | up, including list of any outcome data to be collected for     |       |
| 33 |                        |      | participants who discontinue or deviate from intervention      |       |
| 34 |                        |      | protocols                                                      |       |
| 35 |                        |      |                                                                |       |
| 36 |                        |      |                                                                |       |
| 37 |                        |      |                                                                |       |
| 38 | Data management        | #19  | Plans for data entry, coding, security, and storage, including | 14    |
| 39 |                        |      | any related processes to promote data quality (eg, double      |       |
| 40 |                        |      | data entry; range checks for data values). Reference to        |       |
| 41 |                        |      | where details of data management procedures can be             |       |
| 42 |                        |      | found, if not in the protocol                                  |       |
| 43 |                        |      |                                                                |       |
| 44 |                        |      |                                                                |       |
| 45 |                        |      |                                                                |       |
| 46 | Statistics: outcomes   | #20a | Statistical methods for analysing primary and secondary        | 14-16 |
| 47 |                        |      | outcomes. Reference to where other details of the statistical  |       |
| 48 |                        |      | analysis plan can be found, if not in the protocol             |       |
| 49 |                        |      |                                                                |       |
| 50 |                        |      |                                                                |       |
| 51 | Statistics: additional | #20b | Methods for any additional analyses (eg, subgroup and          | NA    |
| 52 | analyses               |      | adjusted analyses)                                             |       |
| 53 |                        |      |                                                                |       |
| 54 |                        |      |                                                                |       |
| 55 | Statistics: analysis   | #20c | Definition of analysis population relating to protocol non-    | NA    |
| 56 | population and         |      | adherence (eg, as randomised analysis), and any statistical    |       |
| 57 | missing data           |      | methods to handle missing data (eg, multiple imputation)       |       |
| 58 |                        |      |                                                                |       |
| 59 |                        |      |                                                                |       |
| 60 |                        |      |                                                                |       |

|    |                    |      |                                                                  |    |
|----|--------------------|------|------------------------------------------------------------------|----|
| 1  | Data monitoring:   | #21a | Composition of data monitoring committee (DMC); summary          | 17 |
| 2  | formal committee   |      | of its role and reporting structure; statement of whether it is  |    |
| 3  |                    |      | independent from the sponsor and competing interests; and        |    |
| 4  |                    |      | reference to where further details about its charter can be      |    |
| 5  |                    |      | found, if not in the protocol. Alternatively, an explanation of  |    |
| 6  |                    |      | why a DMC is not needed                                          |    |
| 7  |                    |      |                                                                  |    |
| 8  |                    |      |                                                                  |    |
| 9  |                    |      |                                                                  |    |
| 10 |                    |      |                                                                  |    |
| 11 | Data monitoring:   | #21b | Description of any interim analyses and stopping guidelines,     | NA |
| 12 | interim analysis   |      | including who will have access to these interim results and      |    |
| 13 |                    |      | make the final decision to terminate the trial                   |    |
| 14 |                    |      |                                                                  |    |
| 15 |                    |      |                                                                  |    |
| 16 | Harms              | #22  | Plans for collecting, assessing, reporting, and managing         | NA |
| 17 |                    |      | solicited and spontaneously reported adverse events and          |    |
| 18 |                    |      | other unintended effects of trial interventions or trial conduct |    |
| 19 |                    |      |                                                                  |    |
| 20 |                    |      |                                                                  |    |
| 21 | Auditing           | #23  | Frequency and procedures for auditing trial conduct, if any,     | NA |
| 22 |                    |      | and whether the process will be independent from                 |    |
| 23 |                    |      | investigators and the sponsor                                    |    |
| 24 |                    |      |                                                                  |    |
| 25 |                    |      |                                                                  |    |
| 26 |                    |      |                                                                  |    |
| 27 | Research ethics    | #24  | Plans for seeking research ethics committee / institutional      | 17 |
| 28 | approval           |      | review board (REC / IRB) approval                                |    |
| 29 |                    |      |                                                                  |    |
| 30 |                    |      |                                                                  |    |
| 31 | Protocol           | #25  | Plans for communicating important protocol modifications         | NA |
| 32 | amendments         |      | (eg, changes to eligibility criteria, outcomes, analyses) to     |    |
| 33 |                    |      | relevant parties (eg, investigators, REC / IRBs, trial           |    |
| 34 |                    |      | participants, trial registries, journals, regulators)            |    |
| 35 |                    |      |                                                                  |    |
| 36 |                    |      |                                                                  |    |
| 37 | Consent or assent  | #26a | Who will obtain informed consent or assent from potential        | 7  |
| 38 |                    |      | trial participants or authorised surrogates, and how (see        |    |
| 39 |                    |      | Item 32)                                                         |    |
| 40 |                    |      |                                                                  |    |
| 41 |                    |      |                                                                  |    |
| 42 |                    |      |                                                                  |    |
| 43 | Consent or assent: | #26b | Additional consent provisions for collection and use of          | NA |
| 44 | ancillary studies  |      | participant data and biological specimens in ancillary           |    |
| 45 |                    |      | studies, if applicable                                           |    |
| 46 |                    |      |                                                                  |    |
| 47 |                    |      |                                                                  |    |
| 48 | Confidentiality    | #27  | How personal information about potential and enrolled            | 7  |
| 49 |                    |      | participants will be collected, shared, and maintained in        |    |
| 50 |                    |      | order to protect confidentiality before, during, and after the   |    |
| 51 |                    |      | trial                                                            |    |
| 52 |                    |      |                                                                  |    |
| 53 |                    |      |                                                                  |    |
| 54 |                    |      |                                                                  |    |
| 55 | Declaration of     | #28  | Financial and other competing interests for principal            | 23 |
| 56 | interests          |      | investigators for the overall trial and each study site          |    |
| 57 |                    |      |                                                                  |    |
| 58 |                    |      |                                                                  |    |
| 59 | Data access        | #29  | Statement of who will have access to the final trial dataset,    | NA |
| 60 |                    |      |                                                                  |    |



|                                             |      |                                                                                                                                                                                                                                                                                     |       |
|---------------------------------------------|------|-------------------------------------------------------------------------------------------------------------------------------------------------------------------------------------------------------------------------------------------------------------------------------------|-------|
|                                             |      | and disclosure of contractual agreements that limit such access for investigators                                                                                                                                                                                                   |       |
| Ancillary and post trial care               | #30  | Provisions, if any, for ancillary and post-trial care, and for compensation to those who suffer harm from trial participation                                                                                                                                                       | NA    |
| Dissemination policy: trial results         | #31a | Plans for investigators and sponsor to communicate trial results to participants, healthcare professionals, the public, and other relevant groups (eg, via publication, reporting in results databases, or other data sharing arrangements), including any publication restrictions | 17-18 |
| Dissemination policy: authorship            | #31b | Authorship eligibility guidelines and any intended use of professional writers                                                                                                                                                                                                      | NA    |
| Dissemination policy: reproducible research | #31c | Plans, if any, for granting public access to the full protocol, participant-level dataset, and statistical code                                                                                                                                                                     | NA    |
| Informed consent materials                  | #32  | Model consent form and other related documentation given to participants and authorised surrogates                                                                                                                                                                                  | NA    |
| Biological specimens                        | #33  | Plans for collection, laboratory evaluation, and storage of biological specimens for genetic or molecular analysis in the current trial and for future use in ancillary studies, if applicable                                                                                      | NA    |

The SPIRIT checklist is distributed under the terms of the Creative Commons Attribution License CC-BY-ND 3.0. This checklist was completed on 10. July 2018 using <http://www.goodreports.org/>, a tool made by the [EQUATOR Network](#) in collaboration with [Penelope.ai](#)



# BMJ Open

## Increasing Engagement in Advance Care Planning Using a Behavior Change Model: Study Protocol for the STAMP Randomised Controlled Trials

|                                 |                                                                                                                                                                                                                                    |
|---------------------------------|------------------------------------------------------------------------------------------------------------------------------------------------------------------------------------------------------------------------------------|
| Journal:                        | <i>BMJ Open</i>                                                                                                                                                                                                                    |
| Manuscript ID                   | bmjopen-2018-025340.R1                                                                                                                                                                                                             |
| Article Type:                   | Protocol                                                                                                                                                                                                                           |
| Date Submitted by the Author:   | 13-Jul-2018                                                                                                                                                                                                                        |
| Complete List of Authors:       | Fried, Terri R.; Yale Univ,<br>Redding, Colleen<br>Martino, Steven<br>Paiva, Andrea; University of Rhode Island<br>Iannone, Lynne<br>Zenoni, Maria<br>Blakley, Laura<br>Rossi, JS; The University of Rhode Island<br>O'Leary, John |
| <b>Primary Subject Heading</b>: | Geriatric medicine                                                                                                                                                                                                                 |
| Secondary Subject Heading:      | Ethics, Patient-centred medicine                                                                                                                                                                                                   |
| Keywords:                       | advance care planning, health behavior, randomised controlled trial                                                                                                                                                                |
|                                 |                                                                                                                                                                                                                                    |

SCHOLARONE™  
Manuscripts

only

1  
2  
3 Increasing Engagement in Advance Care Planning Using a Behavior Change Model: Study  
4  
5 Protocol for the STAMP Randomised Controlled Trials  
6  
7

8  
9 Terri R. Fried,<sup>1,2</sup> Colleen A. Redding,<sup>3,4</sup> Steven Martino,<sup>5,6</sup> Andrea Paiva,<sup>3,4</sup> Lynne Iannone,<sup>2,7</sup>  
10  
11 Maria Zenoni,<sup>2,7</sup> Laura A. Blakley,<sup>5,6</sup> Joseph S. Rossi,<sup>3,4</sup> John O'Leary<sup>2,7</sup>  
12  
13

14  
15  
16 <sup>1</sup> Department of Medicine, Yale School of Medicine, New Haven, Connecticut, USA

17  
18 <sup>2</sup> Clinical Epidemiology Research Center, VA Connecticut Healthcare System, West Haven,  
19  
20 Connecticut, USA

21  
22 <sup>3</sup> Cancer Prevention Research Center, College of Health Sciences, University of Rhode Island,  
23  
24 Kingston, Rhode Island, USA

25  
26 <sup>4</sup> Psychology Department, College of Health Sciences, University of Rhode Island, Kingston,  
27  
28 Rhode Island, USA

29  
30 <sup>5</sup> Department of Psychiatry, Yale School of Medicine, New Haven, Connecticut, USA

31  
32 <sup>6</sup> Psychology Service, VA Connecticut Healthcare System, West Haven, Connecticut, USA

33  
34  
35 <sup>7</sup> Program on Aging, Yale School of Medicine, New Haven, Connecticut, USA  
36  
37

38  
39 Corresponding author: Terri R. Fried, MD, CERC 240, VA Connecticut Healthcare System, 950

40  
41 Campbell Avenue, West Haven, Connecticut, USA 06516. E-mail: [terri.fried@yale.edu](mailto:terri.fried@yale.edu)

42  
43 Telephone: 1-203-932-5711 x5412  
44  
45

46  
47 Word count: 4,651  
48  
49  
50  
51  
52  
53  
54  
55  
56  
57  
58  
59  
60

## ABSTRACT

**Introduction:** Advance care planning (ACP) is a key component of high-quality end-of-life care but is underutilized. Interventions based on models of behavior change may fill an important gap in available programs to increase ACP engagement. Such interventions are designed for broad outreach and flexibility in delivery. The purpose of the STAMP (Sharing and Talking about My Preferences) study is to examine the efficacy of three behavior-change approaches to increasing ACP engagement through two related randomised controlled trials being conducted in different settings (Veterans Affairs [VA] medical center and community).

**Methods and analysis:** Eligible participants are 55 or older. Participants in the community are being recruited in person in primary care and specialty outpatient practices and senior living sites, and participants in the VA are recruited by telephone. In the community, randomization is at the level of the practice or site, with all persons at a given practice/site receiving either computer-tailored feedback with a behavior stage-matched brochure (CTI) or usual care. At the VA, randomization is at the level of the participant and is stratified by the number of ACP behaviors completed at baseline. Participants are randomised to one of four groups: CTI, motivational interviewing, motivational enhancement therapy, or usual care. The primary outcome is completion of four key ACP behaviors: identification of a surrogate decision maker, communication about goals, completing advance directives, and ensuring documents are in the medical record. Analysis will be conducted using mixed effects models, taking into account the clustered randomisation for the community study.

**Ethics and randomization:** The studies have been approved by the appropriate Institutional Review Boards and are being overseen by a Safety Monitoring Committee. The results of these studies will be disseminated to academic audiences and leadership in in the community and VA sites.

**Trial registration numbers:** NCT03137459, NCT03103828

### Strengths and limitations of this study

- The intervention is based on a comprehensive model of advance care planning (ACP) that focuses on enhancing engagement and improving communication among patients, their surrogates, and their providers.
- The behavioral health approach to ACP provides a framework for practical interventions that can be implemented in a wide variety of settings.
- The interventions have been developed in English only, and the study therefore excludes individuals whose primary language is other than English.
- The study is being conducted in a single geographic region and therefore may have limited generalizability.

**Key words:** Advance care planning; health behavior; randomised controlled trial

## INTRODUCTION

The Institute of Medicine (IOM) report, “Dying in America: Improving Quality and Honoring Individual Preferences near the End of Life” devotes an entire chapter to advance care planning (ACP), the process by which patients can plan for the care they will receive if they become incapable of participating in medical decision making.<sup>1</sup> The report endorses the promise of ACP to provide “a measure of control over the final phase of life” and to ensure that “patients’ wishes are known and respected to the extent possible.” ACP is also associated with improved caregiver outcomes.<sup>2,3</sup> However, as outlined in the IOM report chapter, ACP remains underutilized. A recent systematic review concluded that only approximately one-third of adults in the United States has completed advance directives (ADs).<sup>4</sup> Moreover, ADs alone are not sufficient in the absence of efforts to promote communication.<sup>5</sup>

Several intervention approaches have demonstrated efficacy in increasing engagement in ACP. Respecting Choices, consisting of facilitated discussions lasting between 60 and 90 minutes between patients and their surrogates, increased surrogates’ knowledge of patients’ preferences and reduced caregiver stress.<sup>6,7</sup> The PREPARE website, a self-administered tool providing step-by-step processes for ACP supplemented with video stories and modeling of behaviors, increased ACP documentation.<sup>8</sup> Additional approaches may be necessary to bridge the gap between intensive clinician-led and self-administered tools for ACP engagement. For example, efforts to replicate and disseminate the Respecting Choices program in a large metropolitan area required “concerted and sustained leadership,” a prolonged planning phase and the subsidizing of salaries.<sup>9</sup> This experience suggests that intensive programs are best targeted to selected patients at high risk of facing difficult treatment choices. The IOM report supports such targeting, suggesting a lifespan approach to ACP, beginning early with broad considerations of wishes that become more clinical and detailed over time. This lifespan strategy is congruent with our approach, which is designed to promote widespread dissemination of material that engages individuals in mid-life and works to give them the tools to

1  
2  
3 help them reconsider their wishes over time as health challenges become clearer. While the  
4 PREPARE website provides a thorough introduction to ACP, over 50% of participants had no  
5 access to the internet, and the website was viewed in research offices,<sup>8</sup> suggesting that web-  
6 based materials may have limited outreach.  
7  
8  
9

10  
11 The STAMP (Sharing and Talking about My Preferences) study was designed to address  
12 gaps in the existing programs for promoting participation in ACP. The STAMP interventions are  
13 based on the conceptual model of ACP considered as a set of inter-related health behaviors.<sup>10</sup>  
14 Prior research has demonstrated that participants have variable readiness to engage in ACP  
15 behaviors,<sup>10</sup> and that this readiness can be represented and explained by constructs of the  
16 Transtheoretical Model (TTM), including stages of change, decisional balance (the pros and  
17 cons of behavior change) and processes of change.<sup>11</sup> Readiness is also explained by a  
18 construct of values/beliefs. Unlike the pros and cons, which are factually verifiable, values and  
19 beliefs consist of common misperceptions about ACP and religious values that can function as  
20 barriers to ACP.<sup>11</sup>  
21  
22  
23  
24  
25  
26  
27  
28  
29  
30  
31

32 STAMP evaluates three behavior-change approaches to promoting ACP engagement. The  
33 first is the use of individualized feedback reports with stage-matched brochures.<sup>12</sup> The second is  
34 telephone-delivered motivational interviewing (MI), and the third is telephone-delivered  
35 motivational enhancement therapy (MET), a combination of written feedback and MI. The health  
36 behaviors consist of: a) identifying a trusted individual to act as a surrogate decision maker or  
37 healthcare agent; b) communicating with this person about goals, preferences, and values; c)  
38 completing advance directives (formal assignment of healthcare agent and living will); d)  
39 ensuring both that the physician is aware of documents and that documents are in the medical  
40 record. STAMP consists of two related randomised controlled trials (RCTs). The hypothesis is  
41 that individuals receiving each of the behavior change approaches will be more likely than  
42 individuals receiving usual care to complete all of the health behaviors.  
43  
44  
45  
46  
47  
48  
49  
50  
51  
52  
53  
54  
55  
56  
57  
58  
59  
60

## METHODS AND ANALYSIS

### Study overview:

STAMP consists of two related randomised controlled trials (RCTs), with shared inclusion and exclusion criteria for study participation, measures, outcomes, and analytic approaches but with enrollment procedures and interventions adapted for each of the two trials. Each RCT will test the efficacy of one or more interventions on the proportion of study participants who complete participation in ACP compared to usual care. One RCT is being conducted within the primary care clinics of the Veterans Affairs Connecticut Healthcare System (subsequently referred to as the VA study) and the second is in community-based primary care practices and senior living communities in the greater New Haven area (subsequently referred to as the community study). Trial registration data are provided in Table 1.

### Participants, recruitment, and enrollment:

Inclusion criteria include: age 55 years or older, and, for participants recruited in the VA study, having a primary care clinic visit within the last twelve months. Exclusion criteria include: severe hearing or vision loss, moderate-to-severe cognitive impairment identified by chart review (VA study only), physician diagnosis, Brief Orientation Memory Concentration test score  $> 10^{13}$  or inability to participate in the process of informed consent; primary language other than English; active psychiatric illness (current symptoms of depression, anxiety, substance abuse, or psychosis), no regular access to a telephone; no permanent mailing address; completion of all four ACP behaviors; or lack of physician permission for participation.

Screening, recruitment, and enrollment for participants differs according to study. In the VA study, potential participants are selected from a list obtained under a Health Insurance Portability and Accountability Act waiver of all persons age 55 and older who have had a primary care visit within the last year at VA Connecticut. This method of identifying participants accomplishes two objectives. First, it facilitates oversampling of women and minorities to ensure adequate representation in the study population. The study is aiming for 25% women and 40%

1  
2  
3 non-white participants. Second, it allows for all study procedures to be done by telephone.  
4  
5 Veterans relying on public transportation face a significant barrier to access, with only 25%  
6  
7 living within a 60-minute transit time from a VA medical facility.<sup>14</sup> The ability to identify  
8  
9 individuals and deliver the intervention by telephone is in keeping with the VA's investment in  
10  
11 telehealth to improve access to a variety of services.<sup>15</sup> Chart screens are performed to identify  
12  
13 exclusion criteria. Potentially eligible participants are sent an opt-out letter. If they do not opt out,  
14  
15 a research assistant calls the participant to explain the study and completes the screening for  
16  
17 eligibility. If the participant is eligible and interested in participation, a process of verbal assent is  
18  
19 obtained. Participants who are randomised to MI or MET are asked if they have a surrogate  
20  
21 they would like to include in their MI/MET session. If they do, they are asked to provide the  
22  
23 contact information for the surrogate, who must then provide verbal assent prior to inclusion in  
24  
25 the session. All identifiable data are stored separately from study records, which are identified  
26  
27 by code number, in access-restricted database files behind institutional firewalls. Printed  
28  
29 records are kept in locked offices.  
30  
31

32  
33 Recruitment in the community study is designed to encourage ACP as a part of routine  
34  
35 healthcare. In community practices, the list of patients scheduled for either well patient or  
36  
37 routine follow-up visits is reviewed prior to each clinic session to identify potentially eligible  
38  
39 participants. These individuals are given an information sheet to read prior to the encounter.  
40  
41 The clinician confirms patient interest in the study, and willing individuals meet with a research  
42  
43 assistant at the end of the encounter to complete a process of written informed consent. In  
44  
45 senior living communities, recruitment takes place both in the on-site medical clinics as  
46  
47 described above and among the community as a whole. For the latter, the study is introduced in  
48  
49 a talk given by the principal investigator, followed by the opportunity for volunteers to sign up for  
50  
51 times to meet with the research assistant to complete written informed consent.  
52  
53  
54  
55  
56  
57  
58  
59  
60



## Intervention and control conditions

Similar to recruitment procedures, the intervention arms are tailored to take advantage of the opportunities offered by the different study settings. The availability of health psychologists and MI training at the VA supported the strategy of developing MI interventions to promote ACP engagement in addition to a computer-tailored intervention that generates printed feedback. Therefore, in the VA study, there are four arms: computer-tailored intervention (CTI), MI, MET, and control. In the community, there are two arms: CTI and control. All arms consist of contact at baseline, two months, and four months with delivery of the intervention according to assignment. There is a contact at six months for final assessment.

### CTI

The development of the CTI has been previously described.<sup>12</sup> Briefly, it is an expert system (a software system consisting of an assessment battery, normative data to make comparisons, decision rules for delivering feedback, and feedback components) based on the TTM. TTM intervention principles include respecting and reflecting individuals' stages of change and their progress over time on each construct in individualized feedback reports. Such reports have been found to be effective across a wide range of other health behaviors.<sup>16</sup> The system assesses key constructs of the TTM, including stage of change (readiness to participate in each of the ACP behaviors), decisional balance, values/beliefs, and processes of change. The original system consisted of feedback paragraphs developed for each stage of the four ACP behaviors and for decisional balance, which are pulled into a templated cross-sectional, or "normative," report. For this study, the system was further developed in order to give feedback based on simultaneous consideration of stage for all four behaviors (referred to as stage pattern) as well as to give longitudinal feedback by comparing stage at follow-up to stage at baseline ("ipsative" reporting). Each feedback report consists of: 1) introduction to ACP (common across reports); 2) figure illustrating stage of change for each behavior (normative) and changes in stage at follow-up (ipsative) (see figure 1); 3) brief stage pattern-tailored

1  
2  
3 feedback; 4) feedback for up to three endorsed values/beliefs items; 5) decisional balance by  
4 stage pattern feedback; 6) processes/strategies/efficacy or “next steps” stage pattern-tailored  
5 feedback; 7) summary. For participants in the earliest stages of change for multiple behaviors,  
6 the report provides brief “next steps” focused on activities to help promote favorable attitudes  
7 toward ACP. For participants in later stages, the report provides suggestions for how the  
8 participant can go about engaging in the behavior. The “next steps” section also informs  
9 participants how completing one ACP behavior can help in the completion of others.  
10  
11  
12  
13  
14  
15  
16  
17

18 The feedback reports make reference to one of two stage-matched brochures. Each of  
19 these brochures provides additional details of ACP. The first brochure, provided to participants  
20 who have not yet completed any of the ACP behaviors, provides additional information  
21 promoting the reasons for engaging in ACP and addressing potential barriers. It also contains  
22 two stories describing families who did and did not engage in ACP. The second brochure,  
23 provided to participants who have completed at least one ACP behavior, also contains  
24 additional information about how to engage in each. In addition, this brochure contains either  
25 the VA or state of Connecticut Advance Directives Form. Finally, participants receive a four-fold  
26 pamphlet designed to be given to potential surrogate decision makers in order to explain their  
27 role in ACP.  
28  
29  
30  
31  
32  
33  
34  
35  
36  
37  
38

39 For participants enrolled in the VA, the assessment occurs by telephone and the feedback  
40 report, brochure, and pamphlet are mailed. For participants enrolled in the community, the initial  
41 assessment is done in person in the clinician office or private space in the senior living  
42 community, and the report is printed using a portable printer. If the participant does not have  
43 sufficient time after his/her appointment but has provided informed consent, the assessment is  
44 done by telephone at a later time. All follow-up assessments are done by telephone, with  
45 reports mailed to participants.  
46  
47  
48  
49  
50  
51  
52  
53  
54  
55  
56  
57  
58  
59  
60

## MI

The development of the MI protocol has been previously described.<sup>17</sup> MI sessions are conducted by health psychologists and social workers who have received training by Dr. Martino, a member of the research team and of the Motivational Interviewing Network of Trainers, who is an expert in training clinicians in the conduct of MI for clinical trials.<sup>18-20</sup> The training consisted of a two-day experiential workshop and STAMP MI/MET manual review, followed by supervised practice cases, incorporating fidelity rating-based feedback and coaching based on the review of audio recorded telephone sessions using the Independent Tape Rater Scale.<sup>21</sup> Dr. Martino reviewed and rated all practice cases for initial certification. Initial certification was defined as at least adequate or average adherence and competence ratings on three consecutive practice sessions. If a clinician's performance later drifts below the initial certification level during the trial, then Dr. Martino will provide additional supervision and training and assign another practice case if necessary. The MI intervention consists of four steps: 1) elicitation and clarification of patient's understanding of and current engagement in ACP; 2) building motivation for ACP; 3) developing a change plan; and 4) summarizing the overall discussion. The first step involves understanding in what ways the patient thinks ACP is important and the patient's knowledge of the four key ACP behaviors. Consistent with MI, the Elicit-Provide-Elicit approach is used to deliver ACP. This approach involves inviting the patient to share his/her knowledge, asking the patient permission to provide additional information, and then eliciting the patient's reaction to this new information. The second step consists of four activities that are utilized as needed. The first activity is an enhanced discussion of reasons to engage in ACP, with attention paid to developing the discrepancies between the most important reasons for engagement and lack of ACP participation. The second is addressing beliefs that serve as barriers to ACP. The third is an exercise to help patients clarify their values regarding quality versus quantity of life. Understanding how patients view this trade-off is central to decision making about potentially

1  
2  
3 life-sustaining treatment<sup>22</sup> and is included in a number of ACP tools<sup>23 24</sup> as well as in the  
4 brochure provided with CTI. The fourth activity is a discussion of experiences that could help  
5 ACP engagement. If the participant has a surrogate who agrees to be part of the MI, the  
6 surrogate's perspectives are elicited in each of these steps. In pilot-testing, sessions lasted a  
7 mean (SD) of 34.9 (6.5) minutes.  
8  
9  
10  
11  
12

### 13 MET

14  
15 In the MET arm, participants are provided the CTI TTM-based feedback materials, and then  
16 engage in a MI interview as described above, with the addition of review of the materials with  
17 the clinician. Each component of the interview makes mention as appropriate to specific  
18 sections of the stage-matched brochures to address knowledge gaps and provide more  
19 information about reasons to engage in ACP and addressing ACP barriers. In an additional  
20 section of the interview specific to MET, the clinician reviews the personalized feedback report  
21 with the participant to facilitate the development of a change plan.  
22  
23  
24  
25  
26  
27  
28  
29

### 30 Control

31  
32 Participants in the control arm receive assessments at baseline, two, and four months but  
33 do not receive any additional information about ACP, other than that potentially provided in  
34 usual care. In order to minimize the effect of asking about ACP behaviors on participants'  
35 engagement in these behaviors, the control assessments conclude with questions about  
36 readiness to engage in and pros and cons of physical activity.  
37  
38  
39  
40  
41  
42

### 43 Randomisation

44  
45 Randomisation in the community trial is at the level of the practice/senior living community in  
46 order to avoid contamination. Contamination could occur if patients assigned to the intervention  
47 increased their clinicians' awareness of ACP, and then clinicians changed their behaviors  
48 towards other participants potentially assigned to the control group. Therefore, randomisation  
49 occurs within matched pairs of sites, instead of at the individual level. Sites are matched  
50 according to available data regarding characteristics most likely to be associated with ACP  
51  
52  
53  
54  
55  
56  
57  
58  
59  
60

1  
2  
3 participation. For clinical sites, this includes proportion of patients: age 55 years and older, non-  
4 white, and with Medicaid. For senior living communities, this includes type of community (e.g.  
5 continuing care retirement community) and, if applicable, type of contract (e.g. life care, fee-for-  
6 service). After matching, sites are randomised by means of computer-based random number  
7 generator.  
8  
9  
10  
11  
12

13 Because participants at the VA belong to a very large panel of providers, each of whom  
14 would have only a small number of patients in the study, randomisation is at the level of the  
15 patient. Number of ACP behaviors completed at baseline may be the single variable most highly  
16 associated with the likelihood of full ACP engagement, since engagement is cross-sectionally  
17 related to attitudes, beliefs, and processes related to ACP<sup>11</sup> and to a number of  
18 sociodemographic characteristics<sup>25</sup> and life experiences.<sup>26</sup> Therefore, in order to ensure  
19 balanced representation of number of ACP activities completed at baseline across the four  
20 study arms, participants are assigned using stratified permuted block randomisation with a block  
21 length of eight via a customized computer program that provides the assignment at the time of  
22 randomisation.  
23  
24  
25  
26  
27  
28  
29  
30  
31  
32  
33

### 34 **Blinding**

35  
36  
37 Participants are not blinded to their assignment. Research assistants are not blinded to  
38 participant assignment at interim time points since the assessment, as described below, differs  
39 slightly according to the assignment. However, blinded research assistants ascertain the  
40 primary study outcome at the six-month assessment.  
41  
42  
43  
44

### 45 **Measures**

46  
47 The *primary outcome* is having completed, or being in the action/maintenance stage as  
48 specified in the TTM, for all of the four key ACP behaviors at six months. The designation of  
49 action and maintenance was originally designed for behaviors that required ongoing effort, such  
50 as smoking cessation and exercise, and refer to how long ago the behavior was initiated. While  
51 there are activities that an individual can and should be doing during the maintenance phase of  
52  
53  
54  
55  
56  
57  
58  
59  
60

1  
2  
3 ACP, such as reviewing and updating documents, the focus for this study was on initial  
4 engagement in ACP. Therefore, these two stages were combined. The *secondary outcomes* are  
5 the stage of change for each of the behaviors. The stages of change prior to  
6 action/maintenance are: precontemplation, or not ready to take action within the next six  
7 months; contemplation, or thinking about taking action over the next six months; and  
8 preparation, or planning on taking action in the next thirty days. These variables are measured  
9 at each assessment: baseline, two months, four months, and six months.

10  
11 Sociodemographic, health, and psychosocial status variables are assessed to describe the  
12 study population, test for the adequacy of randomisation, and use as covariates. The  
13 sociodemographic status variables include: age, gender, race/ethnicity, level of education,  
14 income, marital status, housing type, living alone or with others. The health status variables  
15 include: self-rated health,<sup>27</sup> self-rated quality of life, and variables included in a validated  
16 prognostic index for four-year mortality: current tobacco use, chronic conditions, and functional  
17 status.<sup>28</sup> The psychosocial status variables include: depression, measured using the PHQ-2;<sup>29</sup>  
18 and religion, measured using the Duke University Religion Index,<sup>30</sup> and experience with  
19 surrogate medical decision making.<sup>26</sup> These descriptive variables are measured at baseline  
20 only.

21  
22 Additional constructs of the TTM are being assessed both as input for the expert system and  
23 as variables to be used in TTM-based models of ACP as behavior change. These constructs  
24 are posited to be mediation variables in the pathway of behavior change and include decisional  
25 balance, values/beliefs, confidence, and processes of change.<sup>11</sup> ACP knowledge is also  
26 assessed as a potential mediator.<sup>25</sup> These variables are measured at each assessment.

27  
28 The final six-month assessment includes additional evaluation measures, asking  
29 participants how much participation in the study: increased their own interest in ACP, the  
30 interest of a significant other in ACP, and was responsible for their own and/or a significant  
31 other's movement forward with ACP.

1  
2  
3 In order to minimize missing data, a shortened form of the six-month assessment is  
4 available to those participants who do not want to complete a full assessment but are willing to  
5 answer an abbreviated set of items. This outcome assessment consists only of stage of change  
6 for the four ACP behaviors.  
7  
8  
9

10  
11 Participants recruited from community settings complete the baseline assessment as  
12 administered by a research assistant in person, unless they cannot stay after the appointment,  
13 in which case the assessment is completed by phone. They have the choice to complete follow-  
14 up assessments either by telephone or through self-administration. Both participants and  
15 research assistants access the assessment developed through the customization of TTMX,  
16 proprietary behavior change software licensed through Pro-Change Behavior Systems, Inc. The  
17 program is designed to support high-quality data collection by having respondents click on radio  
18 buttons next to responses to minimize data entry errors and not allowing respondents to leave a  
19 page until all questions are answered. Assessments can be completed up to seven days prior to  
20 or 30 days following the target date. Participants recruited from the VA complete all  
21 assessments by telephone.  
22  
23  
24  
25  
26  
27  
28  
29  
30  
31  
32  
33

### 34 **Analytic Plan**

35  
36 The analysis for the community study is based on the study design of two groups  
37 (intervention, control) assessed on four occasions (baseline, 2, 4, 6 months) with sites nested in  
38 groups based on cluster randomization of matched pairs of sites. Baseline analyses will include  
39 examination of group differences to evaluate the success of the matched-pairs randomization  
40 procedure and examination of potential covariates to reduce the expected within-groups  
41 dependency resulting from cluster randomization.  
42  
43  
44  
45  
46  
47  
48

49 The primary analysis will address the hypothesis that the proportion of participants in  
50 Action/Maintenance for the four ACP behaviors will be higher in the intervention group than in  
51 the control group at the six-month assessment. Several analytical approaches are available  
52 within a more general framework of random effects modeling incorporating both time and site  
53  
54  
55  
56  
57  
58  
59



1  
2  
3 level effects in addition to potentially important covariates. The basic analytical approach will  
4 employ the generalized estimating equation (GEE) method to analyze intervention main effects  
5 and interaction (additive) effects.<sup>31</sup> Analytic models will include interaction terms for time point  
6 and site. This will permit an examination of the effect of the intervention not only at the primary  
7 endpoint of six months, but also at the intermediate time points of two and four months.  
8  
9  
10  
11  
12

13 The analysis for the VA study is based on the study design of four groups assessed on four  
14 occasions. The primary analysis for this study will address the hypothesis that the proportions of  
15 participants in Action/Maintenance for the four ACP behaviors will be higher in each intervention  
16 group than in the control group at the six-month assessment. A logistic model that contains  
17 intervention group (CTI, MET, CTI+MET, with reference=control) as a categorical predictor will  
18 be utilized to analyze this outcome. The model will also control for the stratification variable  
19 (number of ACP activities completed at baseline) and for any factors found to be unbalanced  
20 across groups. Pre-specified subgroup analyses will be conducted by using the same logistic  
21 modeling approach within each of the strata. Although the study is not powered to find  
22 significant differences between intervention arms or within strata, the study will provide  
23 preliminary data for future studies regarding the effect sizes for each intervention arm and  
24 potential differences in effectiveness within subgroups.  
25  
26  
27  
28  
29  
30  
31  
32  
33  
34  
35  
36  
37  
38

39 Analytic approaches for secondary outcomes will follow the same plan in both studies and  
40 be similar to those employed for the primary outcome variable. Both categorical and continuous  
41 secondary outcomes will be examined, including specific behavioral and intermediate outcome  
42 measures, such as the number of ACP behaviors changed and ACP attitudes. For continuous  
43 measures, MANOVA, structural equation modeling, latent growth curve modeling, and GEE  
44 techniques will be utilized. For categorical measures, latent transition analysis, logistic  
45 regression, and GEE techniques will be used. For skewed frequency/count data, appropriate  
46 data transformation or Poisson regression approaches can be employed. Secondary analyses  
47 will also examine the nature of behavior change within and across groups over time within the  
48  
49  
50  
51  
52  
53  
54  
55  
56  
57  
58  
59  
60



1  
2  
3 framework of multilevel structural equation modeling (SEM), including latent growth curve  
4 modeling, mediation modeling, cross-lagged panel designs, and model invariance testing.<sup>32-36</sup>  
5  
6 These analyses will examine the relationships between intervention, mediator and moderator  
7 process measures. These analyses will provide considerable insight into how the interventions  
8 may be effecting change and will be especially helpful for continued development and  
9 refinement of the intervention. Mediation analysis in the control group will focus on how TTM  
10 constructs predict longitudinal adoption of ACP. Mediation analysis in the intervention group(s)  
11 will focus on how the TTM constructs and other sociodemographic factors compare as  
12 mediators of effective interventions. Because these modeling approaches can be complex, they  
13 will proceed in stepwise fashion systematically adding constructs and time points to more basic  
14 models to ensure model convergence. Models are built from the simplest to the most complex  
15 that the data and theory can support, using robust estimation methods and bias-corrected  
16 bootstrapping strategies for final model estimation and hypothesis testing.  
17  
18  
19  
20  
21  
22  
23  
24  
25  
26  
27  
28  
29

### 30 **Sample size**

31  
32 The sample size calculation for the community-based study was complicated by the use of  
33 practice site as the unit of treatment assignment and analysis, which introduces an unknown  
34 degree of dependency into the data. This dependency, or intraclass correlation (ICC) was  
35 conservatively assumed to be ICC = .05 based on existing cross-sectional data,<sup>25</sup> without  
36 covariate adjustment.  
37  
38  
39  
40  
41  
42

43 This cross-sectional data also provided an estimate of the prevalence of the primary  
44 outcome of between 4 and 8%.<sup>25</sup> We conservatively estimated that the prevalence of this  
45 outcome in the control group, which, because of our exclusion criteria, will be 0% at baseline,  
46 will be 5% at the six-month assessment. The sample size is based on the ability to detect an  
47 absolute increase of 10% for the primary outcome in the treatment group over the control group,  
48 consistent with effect sizes in previous TTM-tailored interventions and a judgment regarding a  
49 minimum clinically significant effect size. Sample size calculations assumed one-tailed  
50  
51  
52  
53  
54  
55  
56  
57  
58  
59  
60

1  
2  
3 significance testing at  $\alpha = .05$  and were based on a one-way analysis of variance for  
4 proportions with arcsine transformation and nested random effects for sites to accommodate the  
5 cluster-randomised design.<sup>37</sup> Based on an enrollment of a minimum of 16 sites for the study (8  
6 matched pairs), to achieve power of .80 for the primary outcome, a final sample size of 50  
7 individuals per site is needed, resulting in a final study sample size of 800. Assuming 20% loss  
8 to follow-up, we estimate that a baseline sample size of 1000 for the community sample is  
9 required.  
10  
11

12  
13  
14 In the VA study, using the same estimates of 5% prevalence of the primary outcome in the  
15 control group, a sample size of 110 per group is required to detect an absolute increase of 10%  
16 for the primary outcome in each of the intervention groups to achieve a power of .80 with an  
17  $\alpha = .05$ . Based on prior experience within VA samples, a lower 10% loss to follow-up was  
18 assumed, resulting in a baseline sample size of 121 per group, for a total of 484.  
19  
20  
21

## 22 **Patient and Public Involvement**

23  
24 The ACP behaviors that are both the targets of intervention and the outcome measures for  
25 the STAMP studies were developed based on the input of older persons, their surrogate  
26 decision makers, and bereaved caregivers obtained during focus groups<sup>10</sup> and individual  
27 interviews.<sup>38</sup> The assessment and printed intervention materials were pilot-tested and modified  
28 in response to participant feedback, both about the content of the feedback and also regarding  
29 the length and burden of the assessment items.<sup>12</sup> All procedures being utilized in the protocols  
30 were pilot-tested in two practices, and modifications were made in response to feedback both  
31 from patients and physicians. There are no plans to disseminate the study results to  
32 participants.  
33  
34  
35  
36  
37  
38  
39  
40  
41  
42  
43  
44  
45  
46  
47  
48

## 49 **ETHICS AND DISSEMINATION**

### 50 **Ethics**

51  
52 The protocol<sup>7</sup> was reviewed and approved by the Institutional Review Boards of Bridgeport  
53 Hospital, which has governance over the majority of the community clinical sites participating in  
54  
55  
56  
57  
58  
59  
60

1  
2  
3 the study and the Yale School of Medicine, which has governance over the remaining  
4  
5 community sites, and the Human Subjects Subcommittee of VA Connecticut Healthcare  
6  
7 System. The study is being monitored with the use of a Safety Monitoring Committee. Members  
8  
9 of this committee, with expertise in clinical geriatrics and study conduct, have reviewed and  
10  
11 approved all study protocols and materials. Quarterly meetings occur to review any adverse  
12  
13 events.  
14

### 15 **Dissemination**

16  
17  
18 The results of the study will be presented to academic audiences through presentations at  
19  
20 national meetings and publication in peer-reviewed journals. The principal investigator has  
21  
22 partnered with leadership in both the community and VA settings, with ongoing discussion of  
23  
24 how the STAMP interventions can be implemented, if shown to be efficacious.  
25  
26  
27  
28  
29  
30  
31  
32  
33  
34  
35  
36  
37  
38  
39  
40  
41  
42  
43  
44  
45  
46  
47  
48  
49  
50  
51  
52  
53  
54  
55  
56  
57  
58  
59  
60

## REFERENCES

1. Institute of Medicine. Dying in America: Improving and honoring individual preferences near the end of life. Washington, DC: The National Academies Press 2014.
2. Chiarchiaro J, Buddadhumaruk P, Arnold RM, et al. Prior advance care planning is associated with less decisional conflict among surrogates for critically ill patients. *Ann Am Thorac Soc* 2015;12(10):1528-33. doi: 10.1513/AnnalsATS.201504-253OC
3. Wright AA, Zhang B, Ray A, et al. Associations between end-of-life discussions, patient mental health, medical care near death, and caregiver bereavement adjustment. *JAMA* 2008;300(14):1665-73.
4. Yadav KN, Gabler NB, Cooney E, et al. Approximately one in three US adults completes any type of advance directive for end-of-life care. *Health Aff (Millwood)* 2017;36(7):1244-51. doi: 10.1377/hlthaff.2017.0175
5. Sudore RL, Fried TR. Redefining the "planning" in advance care planning: preparing for end-of-life decision making. *Ann Intern Med* 2010;153(4):256-61.
6. Detering KM, Hancock AD, Reade MC, et al. The impact of advance care planning on end of life care in elderly patients: randomised controlled trial. *BMJ* 2010;340:c1345.
7. Kirchhoff KT, Hammes BJ, Kehl KA, et al. Effect of a disease-specific planning intervention on surrogate understanding of patient goals for future medical treatment. *J Am Geriatr Soc* 2010;58(7):1233-40.
8. Sudore RL, Boscardin J, Feuz MA, et al. Effect of the PREPARE website vs an easy-to-read advance directive on advance care planning documentation and engagement among veterans: A randomized clinical trial. *JAMA Intern Med* 2017;177(8):1102-09. doi: 10.1001/jamainternmed.2017.1607
9. Wilson KS, Kottke TE, Schettle S. Honoring Choices Minnesota: Preliminary data from a community-wide advance care planning model. *J Am Geriatr Soc* 2014;62(12):2420-25. doi: 10.1111/jgs.13136

- 1  
2  
3 10. Fried TR, Bullock K, Iannone L, et al. Understanding advance care planning as a process of  
4  
5 health behavior change. *J Am Geriatr Soc* 2009;57(9):1547-55.  
6  
7 11. Fried TR, Redding CA, Robbins ML, et al. Promoting advance care planning as health  
8  
9 behavior change: Development of scales to assess Decisional Balance, Medical and  
10  
11 Religious Beliefs, and Processes of Change. *Patient Educ Couns* 2012;86(1):25-32.  
12  
13 12. Fried TR, Redding CA, Robbins ML, et al. Development of personalized health messages to  
14  
15 promote engagement in advance care planning. *J Am Geriatr Soc* 2016;64(2):359-64.  
16  
17 13. Katzman R, Brown T, Fuld P, et al. Validation of a short Orientation-Memory-Concentration  
18  
19 Test of cognitive impairment. *Am J Psychiatry* 1983;140(6):734-9. doi:  
20  
21 10.1176/ajp.140.6.734 [published Online First: 1983/06/01]  
22  
23 14. Farmer CM, Hosek SD, Adamson DM. Balancing demand and supply for Veterans' health  
24  
25 care: a summary of three RAND assessments conducted under the Veterans Choice  
26  
27 Act. *Rand Health Quarterly* 2016;6(1):12.  
28  
29 15. U.S. Department of Veterans Affairs. VA Telehealth Services [Available from:  
30  
31 <https://www.telehealth.va.gov>] accessed April 20, 2018.  
32  
33 16. Baban A, Craciun C. Changing health-risk behaviors: A review of theory and evidence-  
34  
35 based interventions in health psychology. *J Consult Clin Psychol* 2007;7(1)  
36  
37 17. Fried TR, Leung SL, Blakley LA, et al. Development and pilot testing of a motivational  
38  
39 interview for engagement in advance care planning. *J Palliat Med* 2018;21(7):897-98.  
40  
41 doi: 10.1089/jpm.2018.0095  
42  
43 18. Ball SA, Martino S, Nich C, et al. Site matters: Multisite randomized trial of motivational  
44  
45 enhancement therapy in community drug abuse clinics. *J Consult Clin Psychol*  
46  
47 2007;75(4):556.  
48  
49 19. Carroll KM, Ball SA, Nich C, et al. Motivational interviewing to improve treatment  
50  
51 engagement and outcome in individuals seeking treatment for substance abuse: A  
52  
53 multisite effectiveness study. *Drug Alcohol Depend* 2006;81(3):301-12.  
54  
55  
56  
57  
58  
59  
60

- 1  
2  
3 20. Martino S, Paris M, Jr., Anez L, et al. The effectiveness and cost of clinical supervision for  
4 motivational interviewing: A randomized controlled trial. *J Subst Abuse Treat*  
5  
6  
7 2016;68:11-23. doi: 10.1016/j.jsat.2016.04.005 [published Online First: 2016/07/20]  
8  
9 21. Ball S, Martino S, Corvino J, et al. Independent Tape Rater Guide. Unpublished  
10  
11 psychotherapy tape rating manual. , 2002.  
12  
13 22. Heyland DK, Pichora D, Dodek P, et al. The development and validation of a questionnaire  
14  
15 to audit advance care planning. *Journal of Palliative Care & Medicine* 2012;2:119. doi:  
16  
17 10.4172/2165-7386.1000119  
18  
19 23. Green MJ, Levi BH. Development of an interactive computer program for advance care  
20  
21 planning. *Health Expect* 2009;12(1):60-69.  
22  
23 24. Sudore RL, Knight SJ, McMahan RD, et al. A novel website to prepare diverse older adults  
24  
25 for decision making and advance care planning: A pilot study. *J Pain Symptom Manage*  
26  
27 2014;47(4):674-86. doi: <http://dx.doi.org/10.1016/j.jpainsymman.2013.05.023>  
28  
29 25. Fried TR, Redding CA, Robbins ML, et al. Stages of change for the component behaviors of  
30  
31 advance care planning. *J Am Geriatr Soc* 2010;58(12):2329-36.  
32  
33 26. Amjad H, Towle V, Fried T. Association of experience with illness and end-of-life care with  
34  
35 advance care planning in older adults. *J Am Geriatr Soc* 2014;62(7):1304-09. doi:  
36  
37 10.1111/jgs.12894  
38  
39 27. Idler EL, Benyamini Y. Self-rated health and mortality: a review of twenty-seven community  
40  
41 studies. *J Health Soc Behav* 1997;38(1):21-37.  
42  
43 28. Lee SJ, Lindquist K, Segal MR, et al. Development and validation of a prognostic index for  
44  
45 4-year mortality in older adults. *JAMA* 2006;295(7):801-08. doi: 10.1001/jama.295.7.801  
46  
47 29. Kroenke K, Spitzer RL, Williams JB. The Patient Health Questionnaire-2: validity of a two-  
48  
49 item depression screener. *Med Care* 2003;41(11):1284-92.  
50  
51 30. Koenig HG, Büssing A. The Duke University Religion Index (DUREL): A five-item measure  
52  
53 for use in epidemiological studies. *Religions* 2010;1(1):78-85.  
54  
55  
56  
57  
58  
59  
60

- 1  
2  
3 31. Zeger SL, Liang KY. Longitudinal data analysis for discrete and continuous outcomes.  
4  
5 *Biometrics* 1986;42(1):121-30.  
6  
7 32. Fairchild AJ, MacKinnon DP. A general model for testing mediation and moderation effects.  
8  
9 *Prevent Sci* 2009;10(2):87-99.  
10  
11 33. Kaplan D. Structural Equation Modeling: Foundations and Extensions (2nd ed). Thousand  
12  
13 Oaks, CA: Sage 2009.  
14  
15 34. Kline RB. Principles and Practice of Structural Equation Modeling (4th ed). New York:  
16  
17 Guilford Press 2016.  
18  
19 35. MacKinnon DP, Fairchild AJ, Fritz MS. Mediation analysis. *Annu Rev Psychol* 2007;58:593.  
20  
21 36. Rabe-Hesketh S, Skrondal A, Zheng X. Multilevel structural equation modeling. In: Lee S-Y,  
22  
23 ed. Handbook of Computing and Statistics with Applications: Vol 1. Amsterdam: Elsevier  
24  
25 2007.  
26  
27 37. Rossi JS. Statistical power analysis. In: Schinka JA, Velicer WF, eds. Handbook of  
28  
29 Psychology Volume 2: Research Methods in Psychology, 2nd ed. New York: John Wiley  
30  
31 & Sons 2013:71-108.  
32  
33 38. Fried TR, O'Leary JR. Using the experiences of bereaved caregivers to inform patient- and  
34  
35 caregiver-centered advance care planning. *J Gen Intern Med* 2008;23(10):1602-7.  
36  
37  
38  
39  
40  
41  
42  
43  
44  
45  
46  
47  
48  
49  
50  
51  
52  
53  
54  
55  
56  
57  
58  
59  
60

## **AUTHORS' CONTRIBUTIONS**

Study design: TRF, SM, CAR, AP, JSR    Study conduct: TRF, SM, LI, MZ, LAB, JOL  
Development of interventions: TRF, SM, CAR, AP, LI, MZ, LAB, JOL    Drafting of manuscript:  
TRF    Review of manuscript for critical revisions: all authors    Approval of final manuscript:  
all authors

The views expressed in this article are those of the authors and do not necessarily represent the views of the Department of Veterans Affairs.

## **FUNDING STATEMENT:**

This work is supported by the National Institute of Nursing Research (R01 NR016007), VA Health Services and Research (I01 HX002062), National Institute of Aging (P30 AG21342), and National Center for Research Resources (G20 RR030883). The funders have no role in the study design, collection, management, analysis, and interpretation of data; writing of the report; or the decision to submit the report for publication.

## **COMPETING INTERESTS:**

None declared.



Table 1: Trial registration data

| Category                                      | STAMP (Community)                                                                                                                                                                                                                                                                             | STAMP (VA)                                                              |
|-----------------------------------------------|-----------------------------------------------------------------------------------------------------------------------------------------------------------------------------------------------------------------------------------------------------------------------------------------------|-------------------------------------------------------------------------|
| Primary registry and trial identifying number | ClinicalTrials.gov<br>NCT03103828                                                                                                                                                                                                                                                             | ClinicalTrials.gov<br>NCT03137459                                       |
| Date of registration in primary registry      | 04/27/2017                                                                                                                                                                                                                                                                                    | 03/31/2017                                                              |
| Source(s) of monetary or material support     | NIH/NINR<br>NIH/NIA                                                                                                                                                                                                                                                                           | VA HSR&D                                                                |
| Primary sponsor                               | NIH/NINR                                                                                                                                                                                                                                                                                      | VA HSR&D                                                                |
| Secondary sponsor                             | None                                                                                                                                                                                                                                                                                          | None                                                                    |
| Contact for public queries                    | Lynne Iannone, MS: lynne.iannone@yale.edu                                                                                                                                                                                                                                                     |                                                                         |
| Contact for scientific queries                | Terri Fried, MD: terri.fried@yale.edu                                                                                                                                                                                                                                                         |                                                                         |
| Public title                                  | STAMP: Sharing and Talking about My Preferences                                                                                                                                                                                                                                               |                                                                         |
| Scientific title                              | STAMP: Sharing and Talking about My Preferences                                                                                                                                                                                                                                               |                                                                         |
| Countries of recruitment                      | USA                                                                                                                                                                                                                                                                                           | USA                                                                     |
| Health condition(s) or problem(s) studied     | Advance care planning (ACP)                                                                                                                                                                                                                                                                   |                                                                         |
| Intervention(s)                               | Active comparator: TTM-based CTI; No intervention: usual care                                                                                                                                                                                                                                 | Active comparators: TTM-based CTI, MI, MET; No intervention: usual care |
| Key inclusion and exclusion criteria          | Inclusion: age 55 and older and belonging to healthcare system or residential community. Exclusion: severe hearing impairment, severe visual, moderate to severe cognitive impairment, primary language other than English, active psychiatric illness, completion of all 4 key ACP behaviors |                                                                         |
| Study type                                    | Interventional; allocation: randomised; intervention model: parallel assignment; masking: single masking (outcomes assessor), primary purpose: health services research                                                                                                                       |                                                                         |
| Date of first enrolment                       | July 2017                                                                                                                                                                                                                                                                                     | October 2017                                                            |
| Target sample size                            | 1000                                                                                                                                                                                                                                                                                          | 484                                                                     |
| Recruitment status                            | Recruiting                                                                                                                                                                                                                                                                                    |                                                                         |
| Primary outcome(s)                            | Completion of four key ACP behaviors                                                                                                                                                                                                                                                          |                                                                         |
| Key secondary outcomes                        | Stage of change for each of the four key ACP behaviors                                                                                                                                                                                                                                        |                                                                         |

NIH = National Institutes of Health; NINR = National Institute of Nursing Research; NIA = National Institute on Aging; VA = Veterans Affairs; HSR&D = Health Services Research and Delivery; TTM = Transtheoretical Model; CTI = computer-tailored intervention; MI = motivational interviewing; MET = motivational enhancement therapy

Figure 1 Legend: Example of figure included in follow-up feedback report illustrating change in readiness over time for the ACP behaviors.

1  
2  
3  
4  
5  
6  
7  
8  
9  
10  
11  
12  
13  
14  
15  
16  
17  
18  
19  
20  
21  
22  
23  
24  
25  
26  
27  
28  
29  
30  
31  
32  
33  
34  
35  
36  
37  
38  
39  
40  
41  
42  
43  
44  
45  
46  
47  
48  
49  
50  
51  
52  
53  
54  
55  
56  
57  
58  
59  
60

For peer review only

1  
2  
3  
4  
5  
6  
7  
8  
9  
10  
11  
12  
13  
14  
15  
16  
17  
18  
19  
20  
21  
22  
23  
24  
25  
26  
27  
28  
29  
30  
31  
32  
33  
34  
35  
36  
37  
38  
39  
40  
41  
42  
43  
44  
45  
46  
47  
48  
49  
50  
51  
52  
53  
54  
55  
56  
57  
58  
59  
60

### How Ready Are You?

This figure shows you how ready you are to do each of these steps towards your Advance Care Plan.

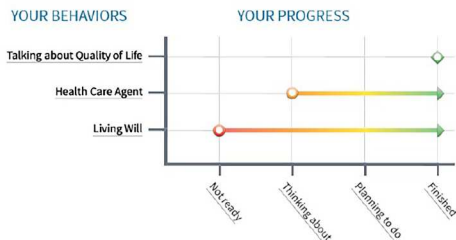

| Your forms are:  | at MD Office | in Medical Record |
|------------------|--------------|-------------------|
| Healthcare Agent | ✓            | -                 |
| Living Will      | ✓            | -                 |

You told us that you are:

- Just like last time, you have finished talking with your loved ones about quality versus quantity of life.
- Last time you were thinking about naming your healthcare agent, and now you have done this. That's great!
- Last time you were not ready to complete your living will, and now you have done this. Good step forward!

304x217mm (300 x 300 DPI)

new only

# Reporting checklist for protocol of a clinical trial.

Based on the SPIRIT guidelines.

## Instructions to authors

Complete this checklist by entering the page numbers from your manuscript where readers will find each of the items listed below.

Your article may not currently address all the items on the checklist. Please modify your text to include the missing information. If you are certain that an item does not apply, please write "n/a" and provide a short explanation.

Upload your completed checklist as an extra file when you submit to a journal.

In your methods section, say that you used the SPIRIT reporting guidelines, and cite them as:

Chan A-W, Tetzlaff JM, Altman DG, Laupacis A, Gøtzsche PC, Krleža-Jerić K, Hróbjartsson A, Mann H, Dickersin K, Berlin J, Doré C, Parulekar W, Summerskill W, Groves T, Schulz K, Sox H, Rockhold FW, Rennie D, Moher D. SPIRIT 2013 Statement: Defining standard protocol items for clinical trials. *Ann Intern Med.* 2013;158(3):200-207

|                                             |     | Reporting Item                                                                                               | Page Number |
|---------------------------------------------|-----|--------------------------------------------------------------------------------------------------------------|-------------|
| Title                                       | #1  | Descriptive title identifying the study design, population, interventions, and, if applicable, trial acronym | 1           |
| Trial registration                          | #2a | Trial identifier and registry name. If not yet registered, name of intended registry                         | 3           |
| Trial registration: data set                | #2b | All items from the World Health Organization Trial Registration Data Set                                     | 23          |
| Protocol version                            | #3  | Date and version identifier                                                                                  | NA          |
| Funding                                     | #4  | Sources and types of financial, material, and other support                                                  | 22          |
| Roles and responsibilities: contributorship | #5a | Names, affiliations, and roles of protocol contributors                                                      | 22          |
| Roles and responsibilities:                 | #5b | Name and contact information for the trial sponsor                                                           | 22          |

|    |                      |      |                                                                   |      |
|----|----------------------|------|-------------------------------------------------------------------|------|
| 1  | sponsor contact      |      |                                                                   |      |
| 2  | information          |      |                                                                   |      |
| 3  |                      |      |                                                                   |      |
| 4  | Roles and            | #5c  | Role of study sponsor and funders, if any, in study design;       | 22   |
| 5  | responsibilities:    |      | collection, management, analysis, and interpretation of           |      |
| 6  | sponsor and funder   |      | data; writing of the report; and the decision to submit the       |      |
| 7  |                      |      | report for publication, including whether they will have          |      |
| 8  |                      |      | ultimate authority over any of these activities                   |      |
| 9  |                      |      |                                                                   |      |
| 10 |                      |      |                                                                   |      |
| 11 |                      |      |                                                                   |      |
| 12 | Roles and            | #5d  | Composition, roles, and responsibilities of the coordinating      | NA   |
| 13 | responsibilities:    |      | centre, steering committee, endpoint adjudication                 |      |
| 14 | committees           |      | committee, data management team, and other individuals or         |      |
| 15 |                      |      | groups overseeing the trial, if applicable (see Item 21a for      |      |
| 16 |                      |      | data monitoring committee)                                        |      |
| 17 |                      |      |                                                                   |      |
| 18 |                      |      |                                                                   |      |
| 19 |                      |      |                                                                   |      |
| 20 | (Background and      | #6a  | Description of research question and justification for            | 4    |
| 21 | rationale            |      | undertaking the trial, including summary of relevant studies      |      |
| 22 |                      |      | (published and unpublished) examining benefits and harms          |      |
| 23 |                      |      | for each intervention                                             |      |
| 24 |                      |      |                                                                   |      |
| 25 |                      |      |                                                                   |      |
| 26 |                      |      |                                                                   |      |
| 27 | Background and       | #6b  | Explanation for choice of comparators                             | 5    |
| 28 | rationale: choice of |      |                                                                   |      |
| 29 | comparators          |      |                                                                   |      |
| 30 |                      |      |                                                                   |      |
| 31 |                      |      |                                                                   |      |
| 32 | Objectives           | #7   | Specific objectives or hypotheses                                 | 5    |
| 33 |                      |      |                                                                   |      |
| 34 |                      |      |                                                                   |      |
| 35 | Trial design         | #8   | Description of trial design including type of trial (eg, parallel | 5-6  |
| 36 |                      |      | group, crossover, factorial, single group), allocation ratio,     |      |
| 37 |                      |      | and framework (eg, superiority, equivalence, non-inferiority,     |      |
| 38 |                      |      | exploratory)                                                      |      |
| 39 |                      |      |                                                                   |      |
| 40 |                      |      |                                                                   |      |
| 41 |                      |      |                                                                   |      |
| 42 | Study setting        | #9   | Description of study settings (eg, community clinic,              | 6    |
| 43 |                      |      | academic hospital) and list of countries where data will be       |      |
| 44 |                      |      | collected. Reference to where list of study sites can be          |      |
| 45 |                      |      | obtained                                                          |      |
| 46 |                      |      |                                                                   |      |
| 47 |                      |      |                                                                   |      |
| 48 | Eligibility criteria | #10  | Inclusion and exclusion criteria for participants. If applicable, | 6    |
| 49 |                      |      | eligibility criteria for study centres and individuals who will   |      |
| 50 |                      |      | perform the interventions (eg, surgeons, psychotherapists)        |      |
| 51 |                      |      |                                                                   |      |
| 52 |                      |      |                                                                   |      |
| 53 |                      |      |                                                                   |      |
| 54 | Interventions:       | #11a | Interventions for each group with sufficient detail to allow      | 7-10 |
| 55 | description          |      | replication, including how and when they will be                  |      |
| 56 |                      |      | administered                                                      |      |
| 57 |                      |      |                                                                   |      |
| 58 |                      |      |                                                                   |      |
| 59 |                      |      |                                                                   |      |
| 60 |                      |      |                                                                   |      |

|    |                      |      |                                                                  |       |
|----|----------------------|------|------------------------------------------------------------------|-------|
| 1  | Interventions:       | #11b | Criteria for discontinuing or modifying allocated                | NA    |
| 2  | modifications        |      | interventions for a given trial participant (eg, drug dose       |       |
| 3  |                      |      | change in response to harms, participant request, or             |       |
| 4  |                      |      | improving / worsening disease)                                   |       |
| 5  |                      |      |                                                                  |       |
| 6  |                      |      |                                                                  |       |
| 7  |                      |      |                                                                  |       |
| 8  | Interventions:       | #11c | Strategies to improve adherence to intervention protocols,       | NA    |
| 9  | adherence            |      | and any procedures for monitoring adherence (eg, drug            |       |
| 10 |                      |      | tablet return; laboratory tests)                                 |       |
| 11 |                      |      |                                                                  |       |
| 12 |                      |      |                                                                  |       |
| 13 | Interventions:       | #11d | Relevant concomitant care and interventions that are             | NA    |
| 14 | concomitant care     |      | permitted or prohibited during the trial                         |       |
| 15 |                      |      |                                                                  |       |
| 16 |                      |      |                                                                  |       |
| 17 | Outcomes             | #12  | Primary, secondary, and other outcomes, including the            | 12-14 |
| 18 |                      |      | specific measurement variable (eg, systolic blood pressure),     |       |
| 19 |                      |      | analysis metric (eg, change from baseline, final value, time     |       |
| 20 |                      |      | to event), method of aggregation (eg, median, proportion),       |       |
| 21 |                      |      | and time point for each outcome. Explanation of the clinical     |       |
| 22 |                      |      | relevance of chosen efficacy and harm outcomes is strongly       |       |
| 23 |                      |      | recommended                                                      |       |
| 24 |                      |      |                                                                  |       |
| 25 |                      |      |                                                                  |       |
| 26 |                      |      |                                                                  |       |
| 27 |                      |      |                                                                  |       |
| 28 | Participant timeline | #13  | Time schedule of enrolment, interventions (including any         | 8, 10 |
| 29 |                      |      | run-ins and washouts), assessments, and visits for               |       |
| 30 |                      |      | participants. A schematic diagram is highly recommended          |       |
| 31 |                      |      | (see Figure)                                                     |       |
| 32 |                      |      |                                                                  |       |
| 33 |                      |      |                                                                  |       |
| 34 |                      |      |                                                                  |       |
| 35 | Sample size          | #14  | Estimated number of participants needed to achieve study         | 16    |
| 36 |                      |      | objectives and how it was determined, including clinical and     |       |
| 37 |                      |      | statistical assumptions supporting any sample size               |       |
| 38 |                      |      | calculations                                                     |       |
| 39 |                      |      |                                                                  |       |
| 40 |                      |      |                                                                  |       |
| 41 |                      |      |                                                                  |       |
| 42 | Recruitment          | #15  | Strategies for achieving adequate participant enrolment to       | 6-7   |
| 43 |                      |      | reach target sample size                                         |       |
| 44 |                      |      |                                                                  |       |
| 45 |                      |      |                                                                  |       |
| 46 | Allocation: sequence | #16a | Method of generating the allocation sequence (eg,                | 11-12 |
| 47 | generation           |      | computer-generated random numbers), and list of any              |       |
| 48 |                      |      | factors for stratification. To reduce predictability of a random |       |
| 49 |                      |      | sequence, details of any planned restriction (eg, blocking)      |       |
| 50 |                      |      | should be provided in a separate document that is                |       |
| 51 |                      |      | unavailable to those who enrol participants or assign            |       |
| 52 |                      |      | interventions                                                    |       |
| 53 |                      |      |                                                                  |       |
| 54 |                      |      |                                                                  |       |
| 55 |                      |      |                                                                  |       |
| 56 |                      |      |                                                                  |       |
| 57 | Allocation           | #16b | Mechanism of implementing the allocation sequence (eg,           | 11-12 |
| 58 | concealment          |      | central telephone; sequentially numbered, opaque, sealed         |       |
| 59 |                      |      |                                                                  |       |
| 60 |                      |      |                                                                  |       |

|    |                        |      |                                                                |       |
|----|------------------------|------|----------------------------------------------------------------|-------|
| 1  | mechanism              |      | envelopes), describing any steps to conceal the sequence       |       |
| 2  |                        |      | until interventions are assigned                               |       |
| 3  |                        |      |                                                                |       |
| 4  | Allocation:            | #16c | Who will generate the allocation sequence, who will enrol      | 11-12 |
| 5  | implementation         |      | participants, and who will assign participants to              |       |
| 6  |                        |      | interventions                                                  |       |
| 7  |                        |      |                                                                |       |
| 8  |                        |      |                                                                |       |
| 9  | Blinding (masking)     | #17a | Who will be blinded after assignment to interventions (eg,     | 12    |
| 10 |                        |      | trial participants, care providers, outcome assessors, data    |       |
| 11 |                        |      | analysts), and how                                             |       |
| 12 |                        |      |                                                                |       |
| 13 |                        |      |                                                                |       |
| 14 | Blinding (masking):    | #17b | If blinded, circumstances under which unblinding is            | NA    |
| 15 | emergency              |      | permissible, and procedure for revealing a participant's       |       |
| 16 | unblinding             |      | allocated intervention during the trial                        |       |
| 17 |                        |      |                                                                |       |
| 18 |                        |      |                                                                |       |
| 19 |                        |      |                                                                |       |
| 20 | Data collection plan   | #18a | Plans for assessment and collection of outcome, baseline,      | 12-13 |
| 21 |                        |      | and other trial data, including any related processes to       |       |
| 22 |                        |      | promote data quality (eg, duplicate measurements, training     |       |
| 23 |                        |      | of assessors) and a description of study instruments (eg,      |       |
| 24 |                        |      | questionnaires, laboratory tests) along with their reliability |       |
| 25 |                        |      | and validity, if known. Reference to where data collection     |       |
| 26 |                        |      | forms can be found, if not in the protocol                     |       |
| 27 |                        |      |                                                                |       |
| 28 |                        |      |                                                                |       |
| 29 |                        |      |                                                                |       |
| 30 |                        |      |                                                                |       |
| 31 | Data collection plan:  | #18b | Plans to promote participant retention and complete follow-    | 13    |
| 32 | retention              |      | up, including list of any outcome data to be collected for     |       |
| 33 |                        |      | participants who discontinue or deviate from intervention      |       |
| 34 |                        |      | protocols                                                      |       |
| 35 |                        |      |                                                                |       |
| 36 |                        |      |                                                                |       |
| 37 |                        |      |                                                                |       |
| 38 | Data management        | #19  | Plans for data entry, coding, security, and storage, including | 14    |
| 39 |                        |      | any related processes to promote data quality (eg, double      |       |
| 40 |                        |      | data entry; range checks for data values). Reference to        |       |
| 41 |                        |      | where details of data management procedures can be             |       |
| 42 |                        |      | found, if not in the protocol                                  |       |
| 43 |                        |      |                                                                |       |
| 44 |                        |      |                                                                |       |
| 45 |                        |      |                                                                |       |
| 46 | Statistics: outcomes   | #20a | Statistical methods for analysing primary and secondary        | 14-16 |
| 47 |                        |      | outcomes. Reference to where other details of the statistical  |       |
| 48 |                        |      | analysis plan can be found, if not in the protocol             |       |
| 49 |                        |      |                                                                |       |
| 50 |                        |      |                                                                |       |
| 51 | Statistics: additional | #20b | Methods for any additional analyses (eg, subgroup and          | NA    |
| 52 | analyses               |      | adjusted analyses)                                             |       |
| 53 |                        |      |                                                                |       |
| 54 |                        |      |                                                                |       |
| 55 | Statistics: analysis   | #20c | Definition of analysis population relating to protocol non-    | NA    |
| 56 | population and         |      | adherence (eg, as randomised analysis), and any statistical    |       |
| 57 | missing data           |      | methods to handle missing data (eg, multiple imputation)       |       |
| 58 |                        |      |                                                                |       |
| 59 |                        |      |                                                                |       |
| 60 |                        |      |                                                                |       |

|    |                    |      |                                                                  |    |
|----|--------------------|------|------------------------------------------------------------------|----|
| 1  | Data monitoring:   | #21a | Composition of data monitoring committee (DMC); summary          | 17 |
| 2  | formal committee   |      | of its role and reporting structure; statement of whether it is  |    |
| 3  |                    |      | independent from the sponsor and competing interests; and        |    |
| 4  |                    |      | reference to where further details about its charter can be      |    |
| 5  |                    |      | found, if not in the protocol. Alternatively, an explanation of  |    |
| 6  |                    |      | why a DMC is not needed                                          |    |
| 7  |                    |      |                                                                  |    |
| 8  |                    |      |                                                                  |    |
| 9  |                    |      |                                                                  |    |
| 10 |                    |      |                                                                  |    |
| 11 | Data monitoring:   | #21b | Description of any interim analyses and stopping guidelines,     | NA |
| 12 | interim analysis   |      | including who will have access to these interim results and      |    |
| 13 |                    |      | make the final decision to terminate the trial                   |    |
| 14 |                    |      |                                                                  |    |
| 15 |                    |      |                                                                  |    |
| 16 | Harms              | #22  | Plans for collecting, assessing, reporting, and managing         | NA |
| 17 |                    |      | solicited and spontaneously reported adverse events and          |    |
| 18 |                    |      | other unintended effects of trial interventions or trial conduct |    |
| 19 |                    |      |                                                                  |    |
| 20 |                    |      |                                                                  |    |
| 21 | Auditing           | #23  | Frequency and procedures for auditing trial conduct, if any,     | NA |
| 22 |                    |      | and whether the process will be independent from                 |    |
| 23 |                    |      | investigators and the sponsor                                    |    |
| 24 |                    |      |                                                                  |    |
| 25 |                    |      |                                                                  |    |
| 26 |                    |      |                                                                  |    |
| 27 | Research ethics    | #24  | Plans for seeking research ethics committee / institutional      | 17 |
| 28 | approval           |      | review board (REC / IRB) approval                                |    |
| 29 |                    |      |                                                                  |    |
| 30 |                    |      |                                                                  |    |
| 31 | Protocol           | #25  | Plans for communicating important protocol modifications         | NA |
| 32 | amendments         |      | (eg, changes to eligibility criteria, outcomes, analyses) to     |    |
| 33 |                    |      | relevant parties (eg, investigators, REC / IRBs, trial           |    |
| 34 |                    |      | participants, trial registries, journals, regulators)            |    |
| 35 |                    |      |                                                                  |    |
| 36 |                    |      |                                                                  |    |
| 37 | Consent or assent  | #26a | Who will obtain informed consent or assent from potential        | 7  |
| 38 |                    |      | trial participants or authorised surrogates, and how (see        |    |
| 39 |                    |      | Item 32)                                                         |    |
| 40 |                    |      |                                                                  |    |
| 41 |                    |      |                                                                  |    |
| 42 |                    |      |                                                                  |    |
| 43 | Consent or assent: | #26b | Additional consent provisions for collection and use of          | NA |
| 44 | ancillary studies  |      | participant data and biological specimens in ancillary           |    |
| 45 |                    |      | studies, if applicable                                           |    |
| 46 |                    |      |                                                                  |    |
| 47 |                    |      |                                                                  |    |
| 48 | Confidentiality    | #27  | How personal information about potential and enrolled            | 7  |
| 49 |                    |      | participants will be collected, shared, and maintained in        |    |
| 50 |                    |      | order to protect confidentiality before, during, and after the   |    |
| 51 |                    |      | trial                                                            |    |
| 52 |                    |      |                                                                  |    |
| 53 |                    |      |                                                                  |    |
| 54 |                    |      |                                                                  |    |
| 55 | Declaration of     | #28  | Financial and other competing interests for principal            | 23 |
| 56 | interests          |      | investigators for the overall trial and each study site          |    |
| 57 |                    |      |                                                                  |    |
| 58 |                    |      |                                                                  |    |
| 59 | Data access        | #29  | Statement of who will have access to the final trial dataset,    | NA |
| 60 |                    |      |                                                                  |    |



|                                             |      |                                                                                                                                                                                                                                                                                     |       |
|---------------------------------------------|------|-------------------------------------------------------------------------------------------------------------------------------------------------------------------------------------------------------------------------------------------------------------------------------------|-------|
|                                             |      | and disclosure of contractual agreements that limit such access for investigators                                                                                                                                                                                                   |       |
| Ancillary and post trial care               | #30  | Provisions, if any, for ancillary and post-trial care, and for compensation to those who suffer harm from trial participation                                                                                                                                                       | NA    |
| Dissemination policy: trial results         | #31a | Plans for investigators and sponsor to communicate trial results to participants, healthcare professionals, the public, and other relevant groups (eg, via publication, reporting in results databases, or other data sharing arrangements), including any publication restrictions | 17-18 |
| Dissemination policy: authorship            | #31b | Authorship eligibility guidelines and any intended use of professional writers                                                                                                                                                                                                      | NA    |
| Dissemination policy: reproducible research | #31c | Plans, if any, for granting public access to the full protocol, participant-level dataset, and statistical code                                                                                                                                                                     | NA    |
| Informed consent materials                  | #32  | Model consent form and other related documentation given to participants and authorised surrogates                                                                                                                                                                                  | NA    |
| Biological specimens                        | #33  | Plans for collection, laboratory evaluation, and storage of biological specimens for genetic or molecular analysis in the current trial and for future use in ancillary studies, if applicable                                                                                      | NA    |

The SPIRIT checklist is distributed under the terms of the Creative Commons Attribution License CC-BY-ND 3.0. This checklist was completed on 10. July 2018 using <http://www.goodreports.org/>, a tool made by the [EQUATOR Network](#) in collaboration with [Penelope.ai](#)
