# Supplementary material for: Increasing engagement in advance care planning using a behaviour change model: study protocol for the STAMP randomised controlled trials
Source: PubMed Central journal article supplement — BMJ Open. 2018 Aug 10;8(8):e025340. doi: 10.1136/bmjopen-2018-025340 (PMC6089328; doi:10.1136/bmjopen-2018-025340), 2018-08-10
Supplement: bmjopen-2018-025340.reviewer_comments.pdf [file bmjopen-2018-025340.reviewer_comments.pdf]

## PEER REVIEW HISTORY

BMJ Open publishes all reviews undertaken for accepted manuscripts. Reviewers are asked to complete a checklist review form (<http://bmjopen.bmj.com/site/about/resources/checklist.pdf>) and are provided with free text boxes to elaborate on their assessment. These free text comments are reproduced below.

## ARTICLE DETAILS

|                            |                                                                                                                                            |
|----------------------------|--------------------------------------------------------------------------------------------------------------------------------------------|
| <b>TITLE (PROVISIONAL)</b> | Increasing Engagement in Advance Care Planning Using a Behavior Change Model: Study Protocol for the STAMP Randomised Controlled Trials    |
| <b>AUTHORS</b>             | Fried, Terri R.; Redding, Colleen; Martino, Steven; Paiva, Andrea; Iannone, Lynne; Zenoni, Maria; Blakley, Laura; Rossi, JS; O'Leary, John |

This article was not externally reviewed at BMJ Open. Protocols that have been independently assessed prior to submission to BMJ Open are usually fast-tracked to publication on the grounds that further substantial changes will not be possible. This independent assessment will usually be external, independent review for both a substantial grant award from a non-commercial or government funder and ethics approval.
